# Supplementary material for: New Hybrid Compounds Incorporating Natural Products as Multifunctional Agents against Alzheimer’s Disease
Source: MDPI journal article supplement (doi:10.3390/pharmaceutics15102369), 2023-09-22
Supplement: s1 [file s1]

## Spectrum S1: <sup>1</sup>H-NMR spectrum of compound 1a

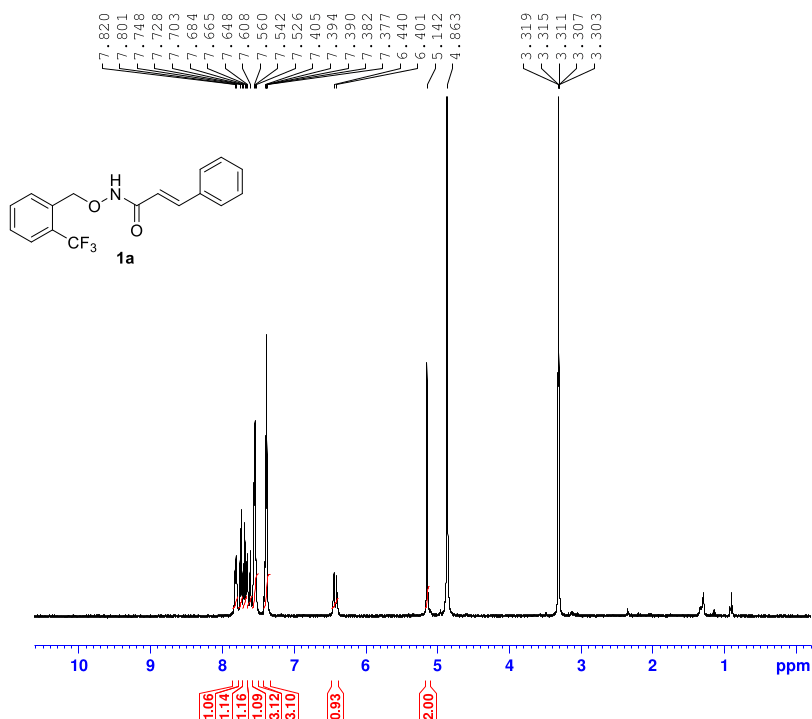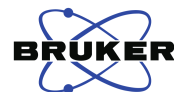

Current Data Parameters  
NAME IG-2  
EXPNO 1  
PROCNO 1

F2 - Acquisition Parameters  
Date\_ 20211004  
Time 11.36 h  
INSTRUM spect  
PROBHD Z108618\_0601 ( )  
PULPROG zg30  
TD 65536  
SOLVENT MeOD  
NS 24  
DS 0  
SWH 6009.615 Hz  
FIDRES 0.183399 Hz  
AQ 5.452952 sec  
RG 203  
DW 83.200 usec  
DE 13.02 usec  
TE 297.7 K  
D1 1.00000000 sec  
TD0 1  
SF01 400.1324710 MHz  
NUC1 1H  
P0 5.00 usec  
P1 15.00 usec  
PLW1 19.00000000 W

F2 - Processing parameters  
SI 65536  
SF 400.1300070 MHz  
WDW no  
SSB 0  
LB 0 Hz  
GB 0  
PC 1.00

## Spectrum S2: <sup>13</sup>C-NMR spectrum of compound 1a

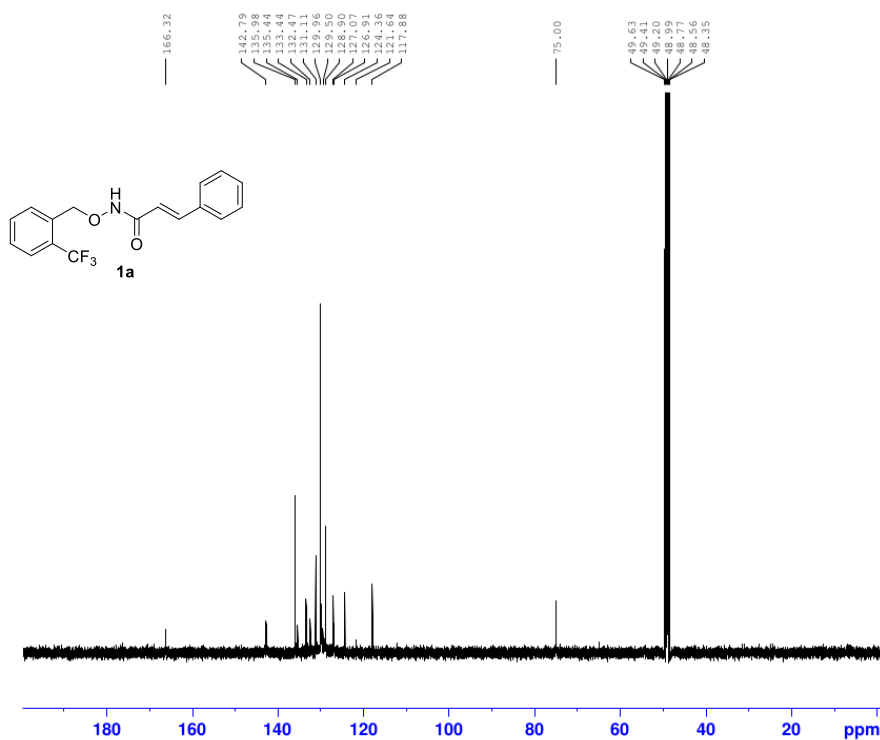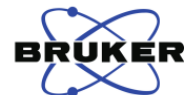

Current Data Parameters  
NAME IG-2  
EXPNO 4  
PROCNO 1

F2 - Acquisition Parameters  
Date\_ 20211015  
Time 15.22 h  
INSTRUM spect  
PROBHD Z108618\_0601 ( )  
PULPROG zgpg30  
TD 65536  
SOLVENT MeOD  
NS 2368  
DS 4  
SWH 24038.461 Hz  
FIDRES 0.733596 Hz  
AQ 1.3631488 sec  
RG 203  
DW 20.800 usec  
DE 9.97 usec  
TE 295.3 K  
D1 2.00000000 sec  
D11 0.03000000 sec  
TD0 10  
SF01 100.6228293 MHz  
NUC1 13C  
P0 3.33 usec  
P1 10.00 usec  
PLW1 38.00000000 W  
SF02 400.1316005 MHz  
NUC2 1H  
CPDPRG2 waltz16  
PCPD2 220.00 usec  
PLW2 19.00000000 W  
PLW12 0.08832600 W  
PLW13 0.26547000 W

F2 - Processing parameters  
SI 32768  
SF 100.6126302 MHz  
WDW no  
SSB 0  
LB 0 Hz  
GB 0  
PC 1.40

### Spectrum S3: Mass spectrum of compound **1a**

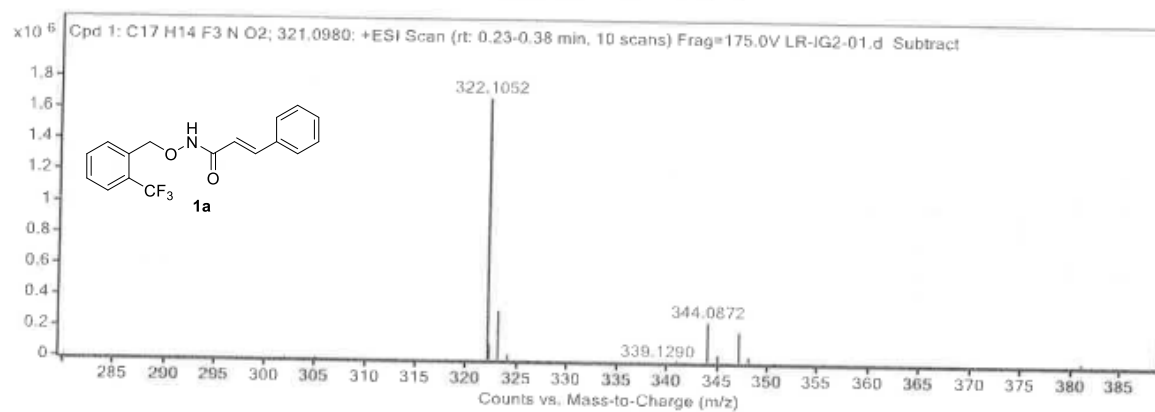

Spectrum S4: <sup>1</sup>H-NMR spectrum of compound **1b**

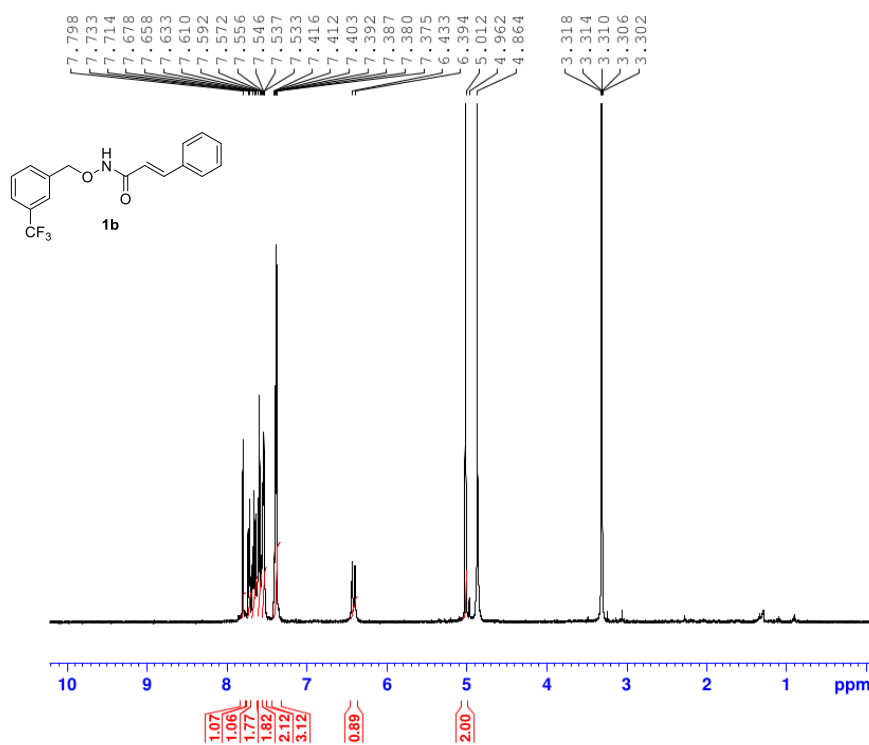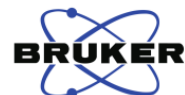

Current Data Parameters  
NAME IG-3  
EXPNO 1  
PROCNO 1

F2 - Acquisition Parameters  
Date\_ 20211005  
Time 15.52 h  
INSTRUM spect  
PROBHD Z108618\_0601 (  
PULPROG zg30  
TD 65536  
SOLVENT MeOD  
NS 32  
DS 0  
SWH 6009.615 Hz  
FIDRES 0.183399 Hz  
AQ 5.4525952 sec  
RG 203  
DW 83.200 usec  
DE 13.02 usec  
TE 297.5 K  
D1 1.0000000 sec  
TD0 1  
SFO1 400.1324710 MHz  
NUC1 1H  
P0 5.00 usec  
P1 15.00 usec  
PLW1 19.0000000 W

F2 - Processing parameters  
SI 65536  
SF 400.1300075 MHz  
WDW no  
SSB 0  
LB 0 Hz  
GB 0  
PC 1.00

Spectrum S5: <sup>13</sup>C-NMR spectrum of compound **1b**

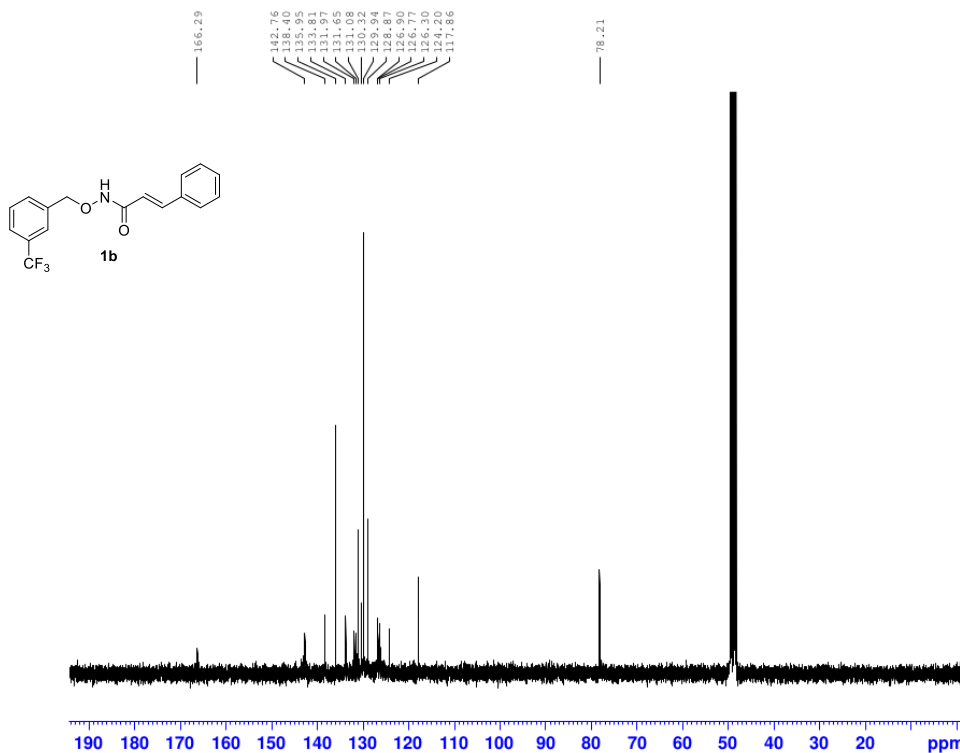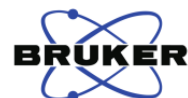

Current Data Parameters  
NAME IG-3  
EXPNO 2  
PROCNO 1

F2 - Acquisition Parameters  
Date\_ 20211013  
Time 15.25 h  
INSTRUM spect  
PROBHD Z108618\_0601 (  
PULPROG zgpg30  
TD 65536  
SOLVENT MeOD  
NS 2417  
DS 4  
SWH 24038.461 Hz  
FIDRES 0.733596 Hz  
AQ 1.3631488 sec  
RG 203  
DW 20.800 usec  
DE 9.97 usec  
TE 295.6 K  
D1 2.00000000 sec  
D11 0.03000000 sec  
TD0 10  
SFO1 100.6228293 MHz  
NUC1 13C  
P0 3.33 usec  
P1 10.00 usec  
PLW1 38.0000000 W  
SFO2 400.1316005 MHz  
NUC2 1H  
PCPD2 waltz16  
PCPD2 220.00 usec  
PLW2 19.00000000 W  
PLW12 0.08832600 W  
PLW13 0.26547000 W

F2 - Processing parameters  
SI 32768  
SF 100.6126323 MHz  
WDW no  
SSB 0  
LB 0 Hz  
GB 0  
PC 1.40

**Spectrum S6: Mass spectrum of compound 1b**

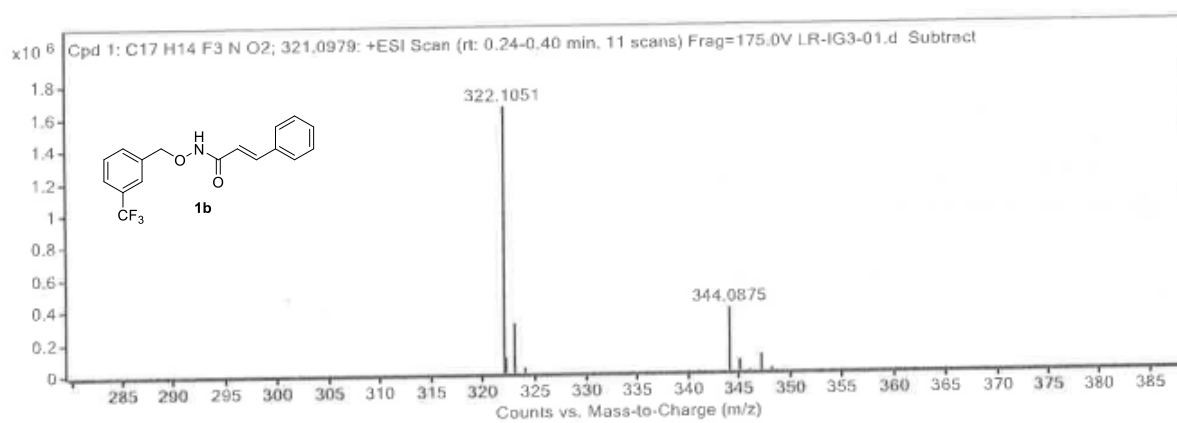

Spectrum S7: <sup>1</sup>H-NMR spectrum of compound **1c**

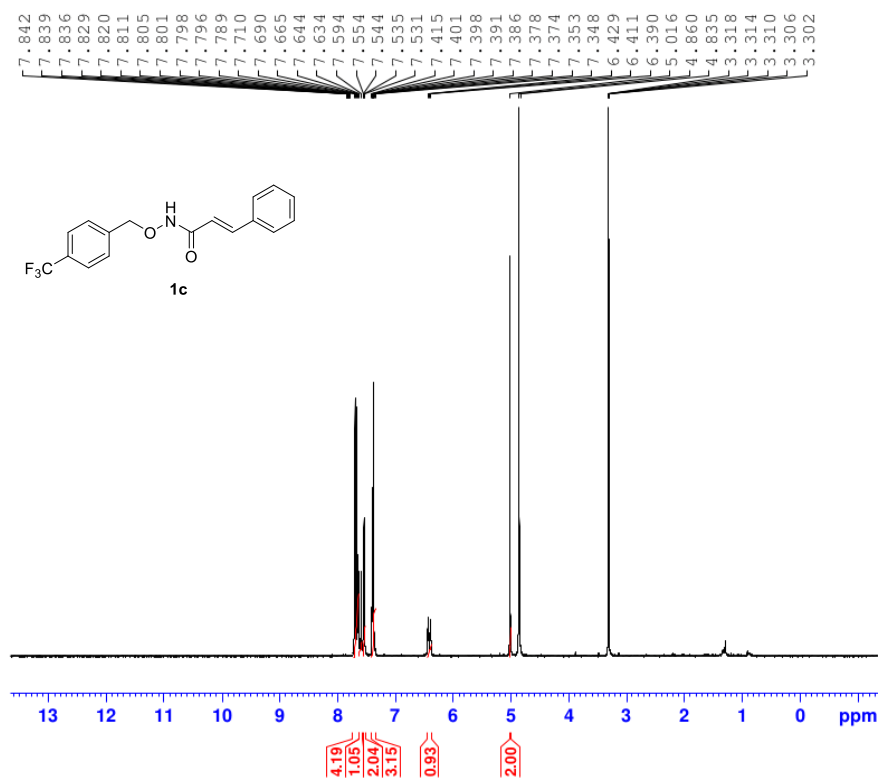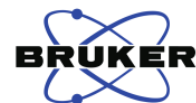

Current Data Parameters  
NAME IG-1  
EXPNO 4  
PROCNO 1

F2 - Acquisition Parameters  
Date\_ 20211001  
Time 17.06 h  
INSTRUM spect  
PROBHD Z108618\_0601 ( )  
PULPROG zg30  
TD 65536  
SOLVENT MeOD  
NS 24  
DS 0  
SWH 6009.615 Hz  
FIDRES 0.183399 Hz  
AQ 5.4525952 sec  
RG 203  
DW 83.200 usec  
DE 13.02 usec  
TE 298.0 K  
D1 1.00000000 sec  
TD0 1  
SFO1 400.1324710 MHz  
NUC1 1H  
P0 5.00 usec  
P1 15.00 usec  
PLW1 19.00000000 W

F2 - Processing parameters  
SI 65536  
SF 400.1300075 MHz  
WDW no  
SSB 0  
LB 0 Hz  
GB 0  
PC 1.00

Spectrum S8: <sup>13</sup>C-NMR spectrum of compound **1c**

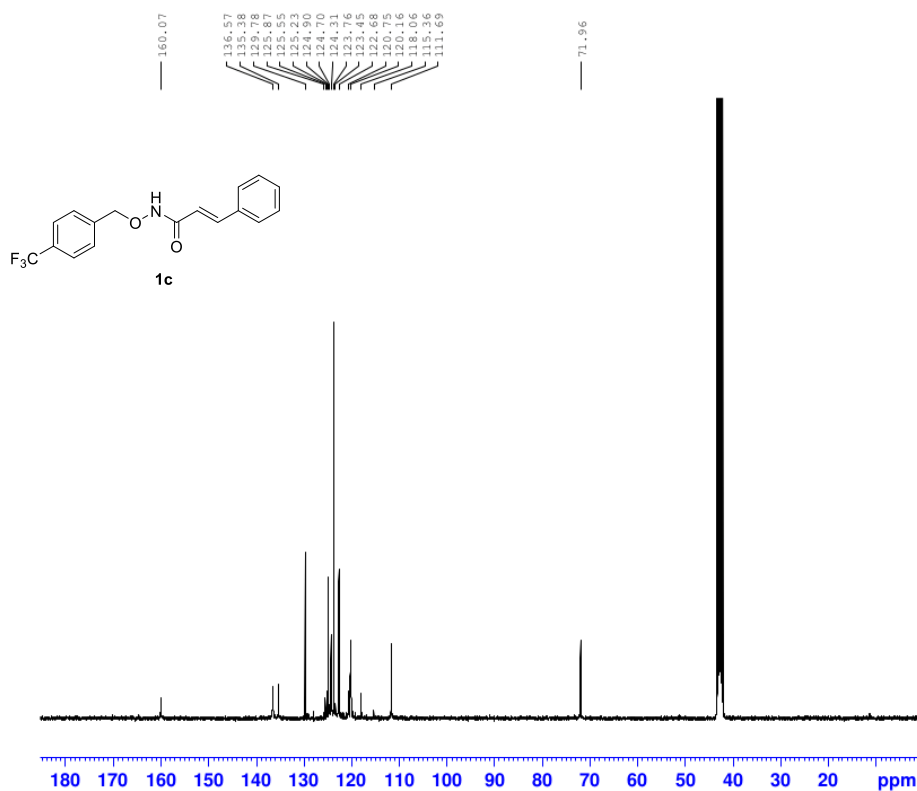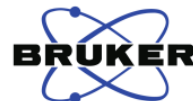

Current Data Parameters  
NAME IG-1  
EXPNO 6  
PROCNO 1

F2 - Acquisition Parameters  
Date\_ 20211006  
Time 8.49 h  
INSTRUM spect  
PROBHD Z108618\_0601 ( )  
PULPROG zgpg30  
TD 65536  
SOLVENT MeOD  
NS 15688  
DS 4  
SWH 24038.461 Hz  
FIDRES 0.733596 Hz  
AQ 1.3631488 sec  
RG 203  
DW 20.800 usec  
DE 9.97 usec  
TE 298.1 K  
D1 2.00000000 sec  
D11 0.03000000 sec  
TD0 10  
SFO1 100.6228293 MHz  
NUC1 13C  
P0 3.33 usec  
P1 10.00 usec  
PLW1 38.00000000 W  
SFO2 400.1316005 MHz  
NUC2 1H  
CPDPRG2 waltz16  
PCPD2 220.00 usec  
PLW2 19.00000000 W  
PLW12 0.08832600 W  
PLW13 0.26547000 W

F2 - Processing parameters  
SI 32768  
SF 100.6132538 MHz  
WDW EM  
SSB 0  
LB 1.00 Hz  
GB 0  
PC 1.40

**Spectrum S9:** Mass spectrum of compound **1c**

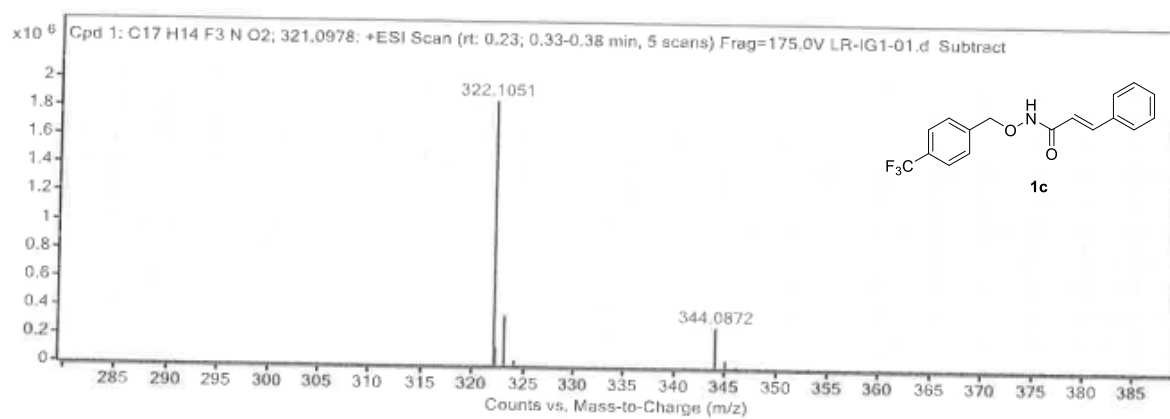

Spectrum S10: <sup>1</sup>H-NMR spectrum of compound 2a

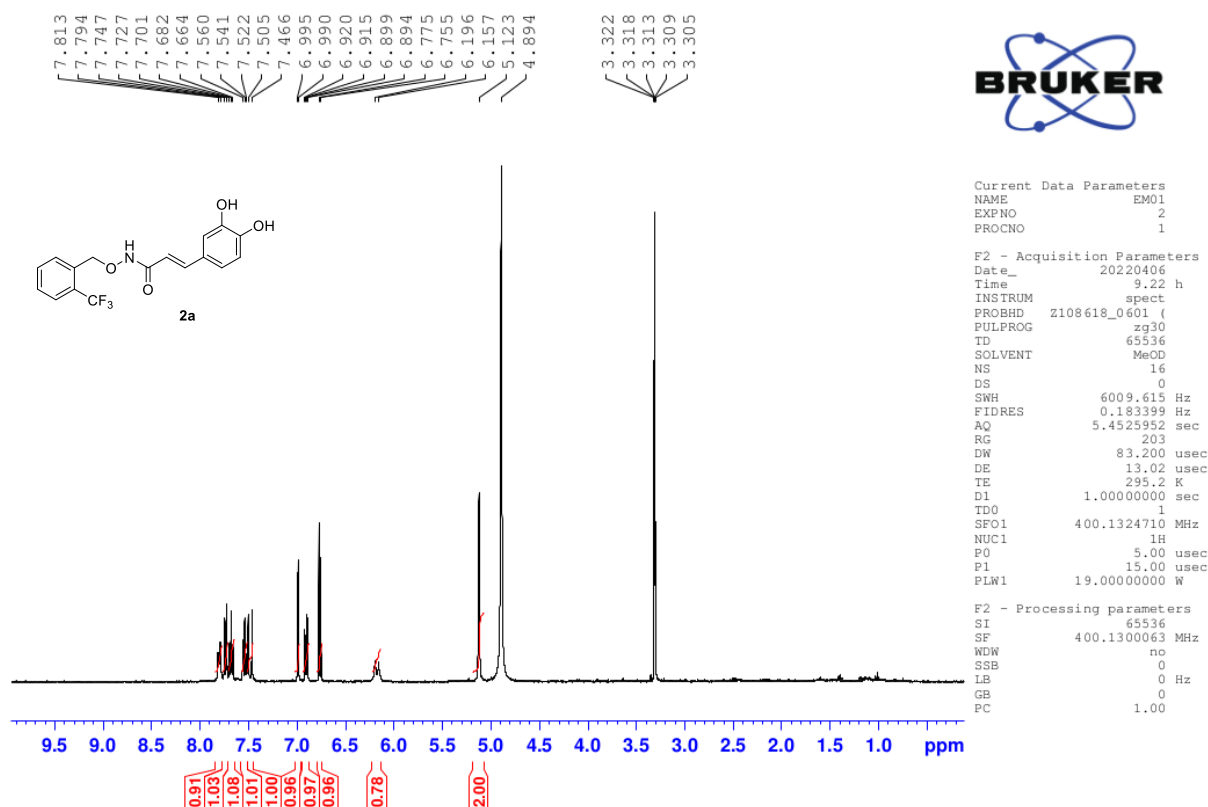

Spectrum S11: <sup>13</sup>C-NMR spectrum of compound 2a

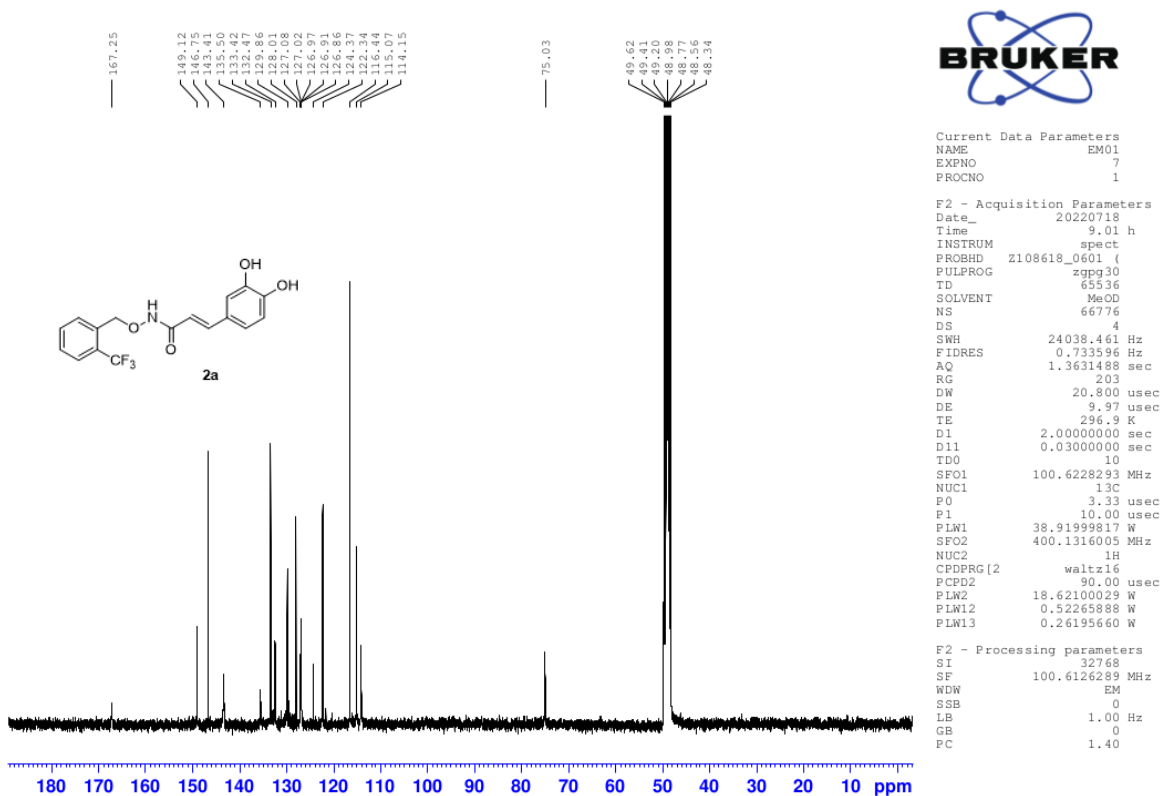

## Spectrum S12: Mass spectrum of compound 2a

EM01 #8 RT: 0.07 AV: 1 NL: 1.13E9  
T: FTMS + p ESI Full ms [150.0000-2000.0000]

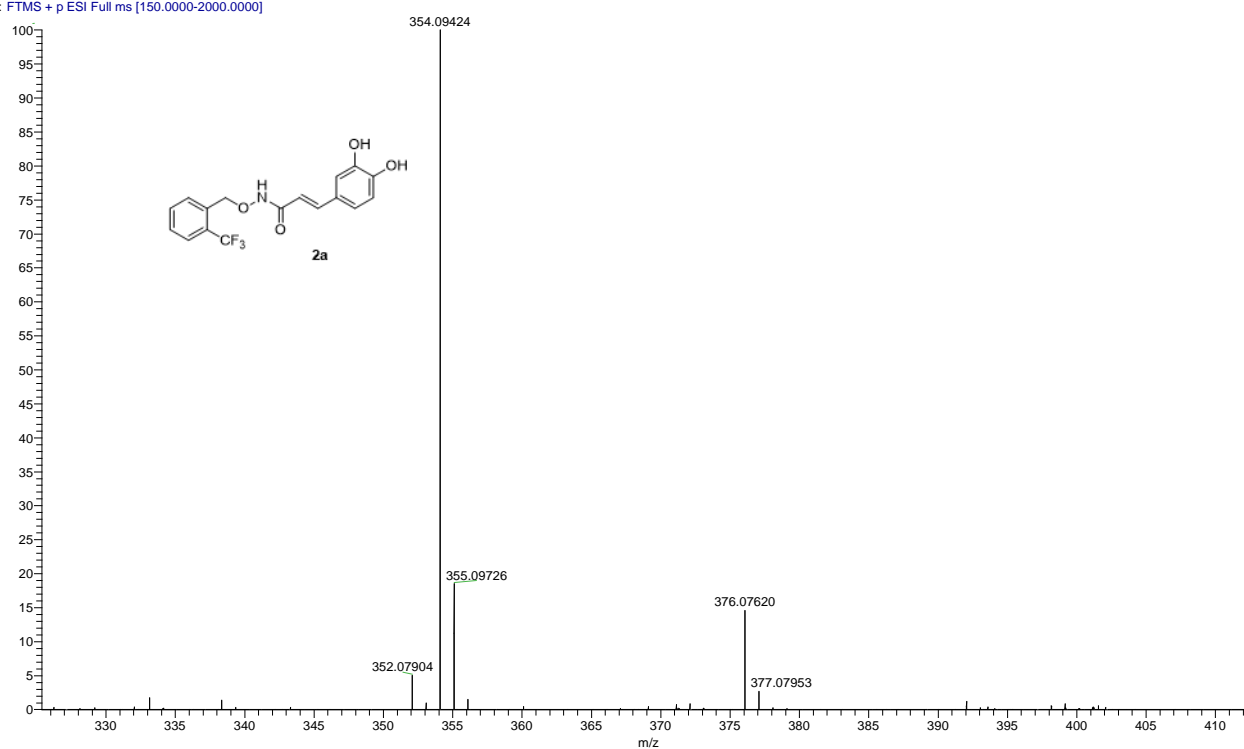



### Spectrum S13: <sup>1</sup>H-NMR spectrum of compound **2b**

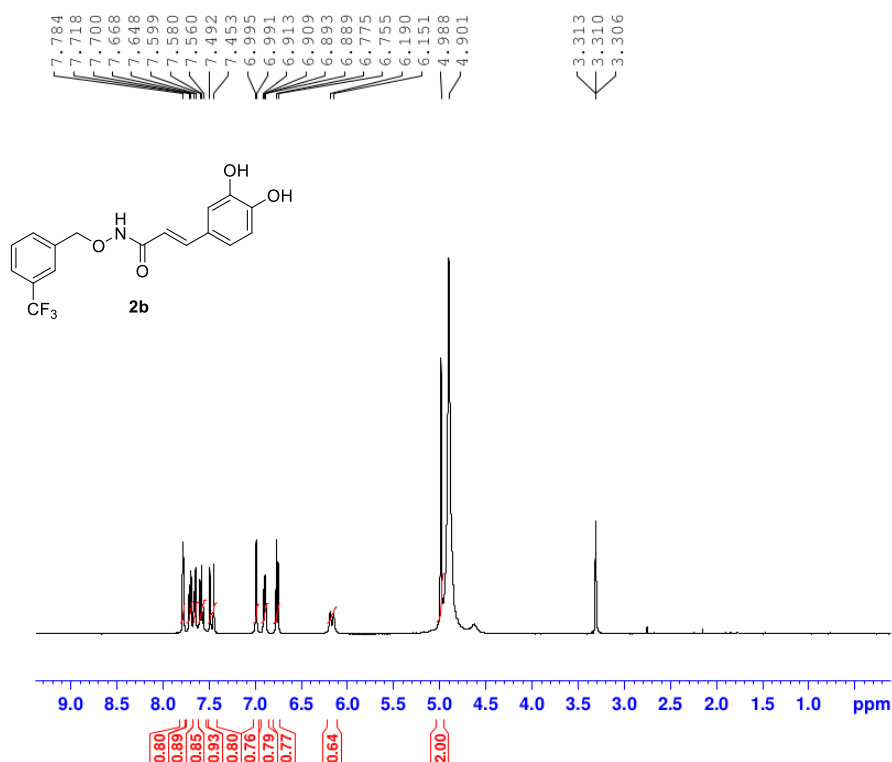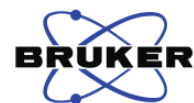

Current Data Parameters  
NAME EM02  
EXPNO 1  
PROCNO 1

F2 - Acquisition Parameters  
Date\_ 20220505  
Time 10.48 h  
INSTRUM spect  
PROBHD Z108618\_0601 ( )  
PULPROG zg30  
TD 65536  
SOLVENT MeOD  
NS 8  
DS 0  
SWH 6009.615 Hz  
FIDRES 0.183399 Hz  
AQ 5.4525952 sec  
RG 64  
DW 83.200 usec  
DE 13.02 usec  
TE 295.8 K  
D1 1.00000000 sec  
TD0 1  
SF01 400.1324710 MHz  
NUC1 1H  
P0 5.00 usec  
P1 15.00 usec  
PLW1 19.00000000 W

F2 - Processing parameters  
SI 65536  
SF 400.1300078 MHz  
WDW EM  
SSB 0  
LB 0.30 Hz  
GB 0  
PC 1.00

### Spectrum S14: <sup>13</sup>C-NMR spectrum of compound **2b**

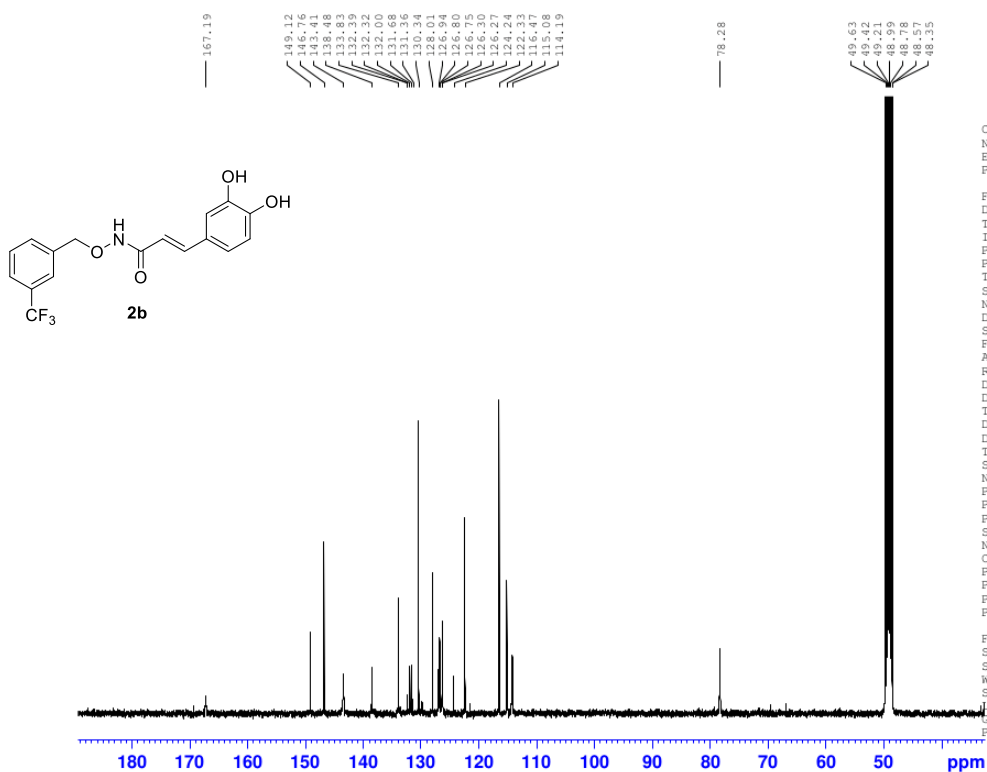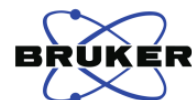

Current Data Parameters  
NAME EM02  
EXPNO 2  
PROCNO 1

F2 - Acquisition Parameters  
Date\_ 20220712  
Time 8.14 h  
INSTRUM spect  
PROBHD Z108618\_0601 ( )  
PULPROG zgpg30  
TD 65536  
SOLVENT MeOD  
NS 14546  
DS 4  
SWH 24038.461 Hz  
FIDRES 0.733596 Hz  
AQ 1.3631488 sec  
RG 203  
DW 20.800 usec  
DE 9.97 usec  
TE 299.7 K  
D1 2.00000000 sec  
D11 0.03000000 sec  
TD0 10  
SF01 100.6228293 MHz  
NUC1 13C  
P0 3.33 usec  
P1 10.00 usec  
PLW1 38.91999817 W  
SF02 400.1316005 MHz  
NUC2 1H  
CPDPRG2 waltz16  
PCPD2 90.00 usec  
PLW2 18.62100029 W  
PLW12 0.52265888 W  
PLW13 0.26195660 W

F2 - Processing parameters  
SI 32768  
SF 100.6126286 MHz  
WDW EM  
SSB 0  
LB 1.00 Hz  
GB 0  
PC 1.40

## Spectrum S15: Mass spectrum of compound **2b**

EM02 #13 RT: 0.12 AV: 1 NL: 2.06E8  
T: FTMS + p ESI Full ms [150.0000-800.0000]

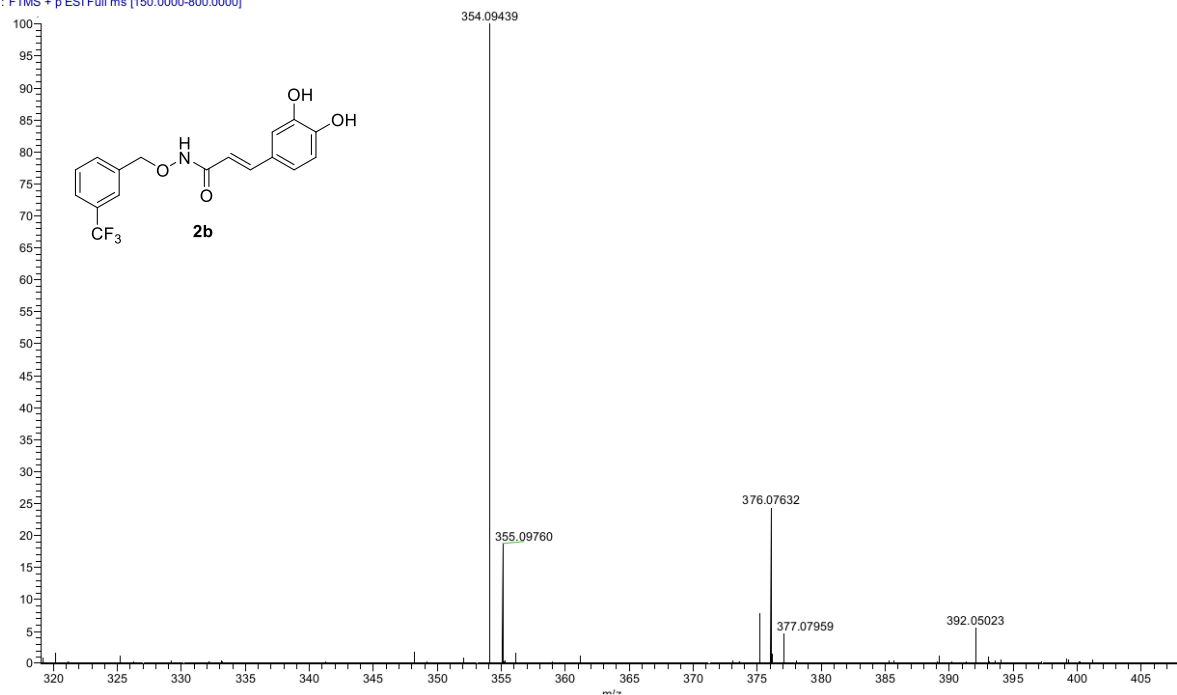

**Spectrum S16:** <sup>1</sup>H-NMR spectrum of compound **2c**

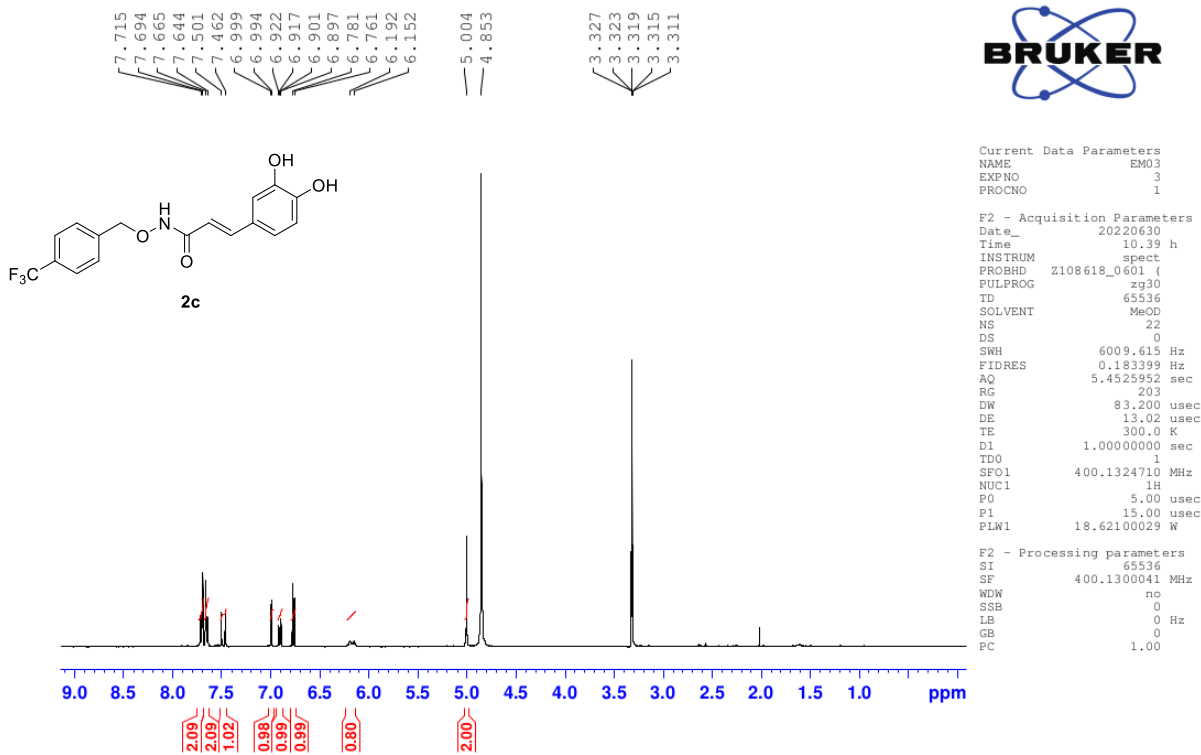

**Spectrum S17:**  $^{13}\text{C}$ -NMR spectrum of compound **2c**

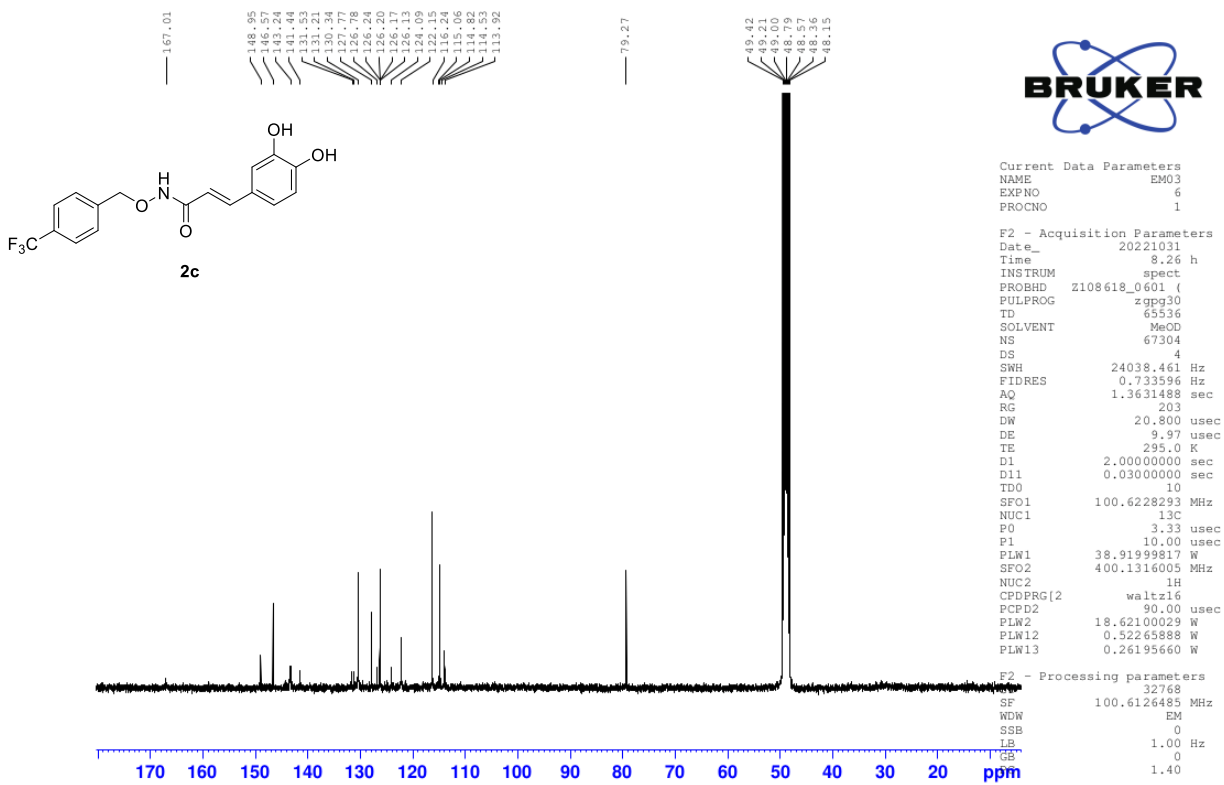

## Spectrum S18: Mass spectrum of compound 2c

EM03 #1 RT: 0.01 AV: 1 NL: 1.71E8  
T: FTMS + p ESI Full ms [150.0000-800.0000]

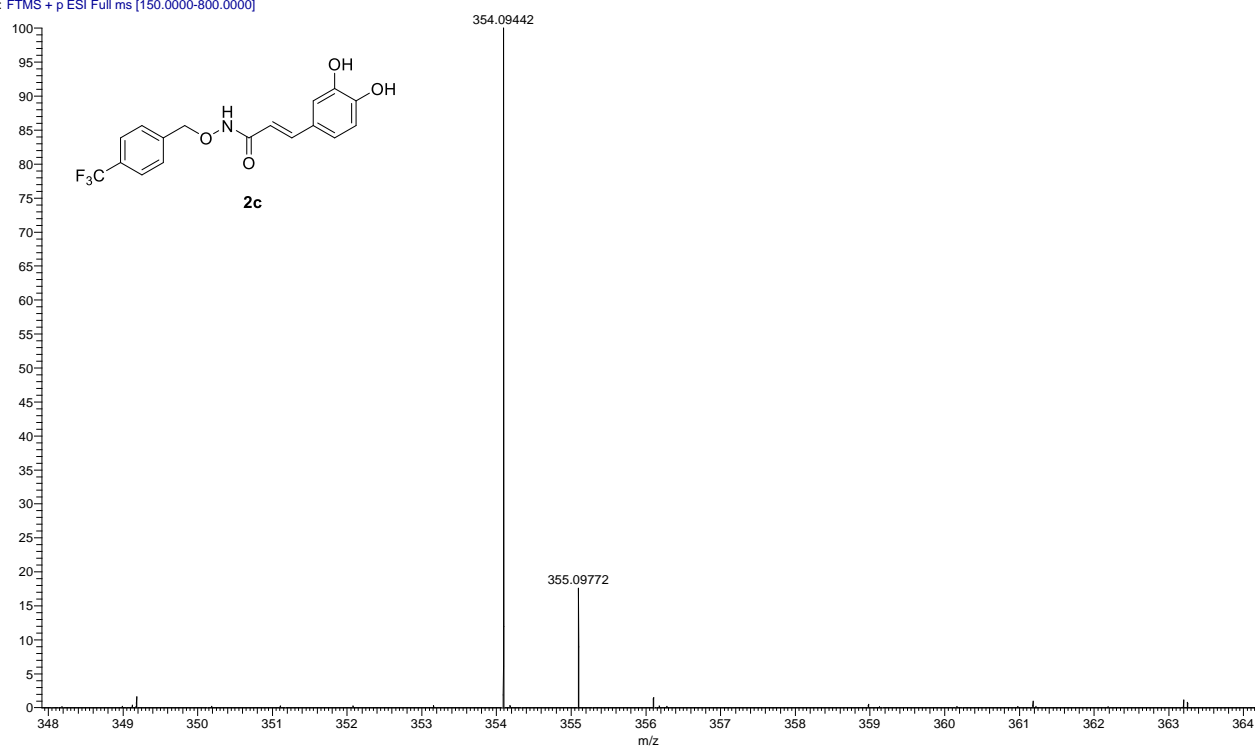

Spectrum S19: <sup>1</sup>H-NMR spectrum of compound 3a

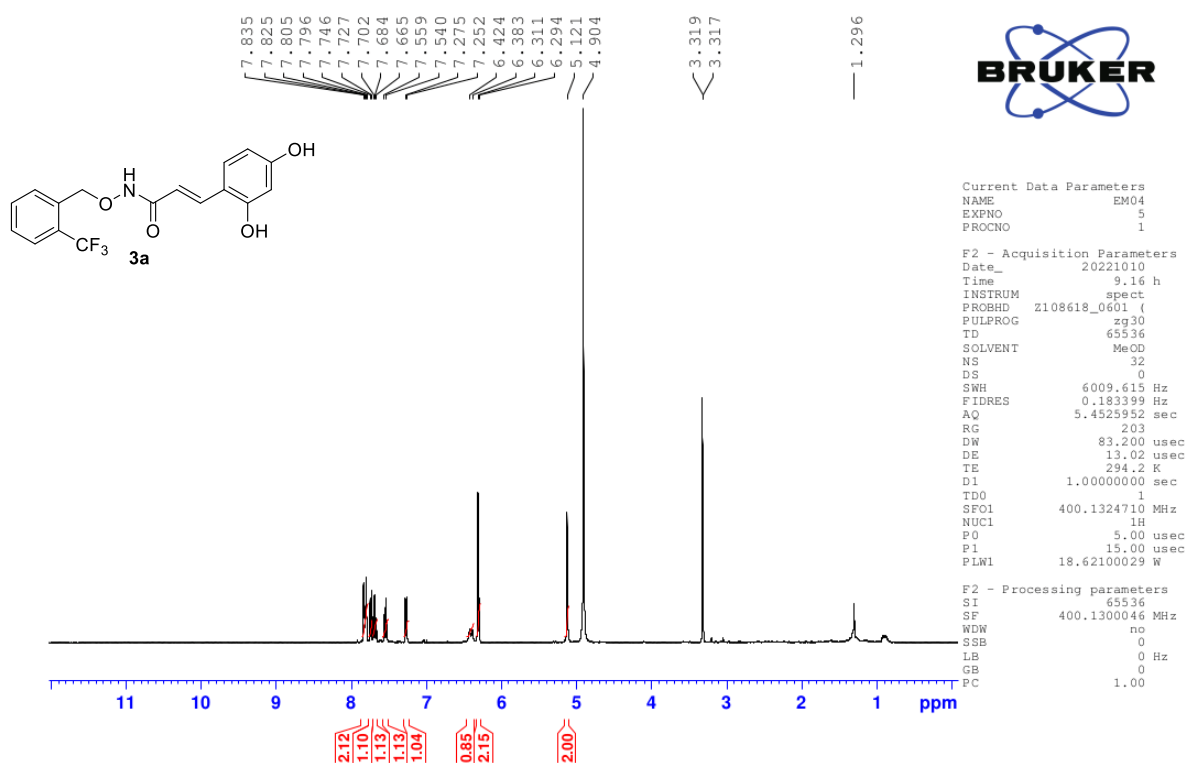

Spectrum S20: <sup>13</sup>C-NMR spectrum of compound 3a

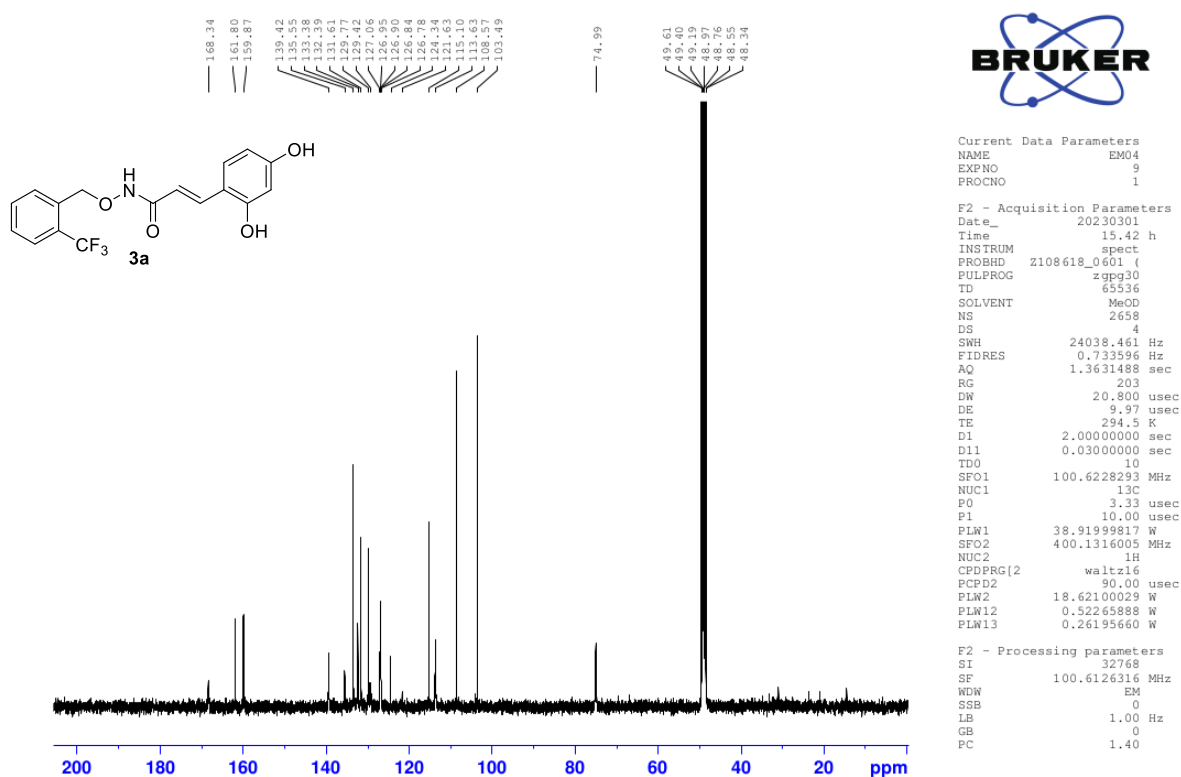

## Spectrum S21: Mass spectrum of compound 3a

EM04 #435 RT: 4.03 AV: 1 NL: 5.08E8  
T: FTMS + p ESI Full ms [150.0000-800.0000]

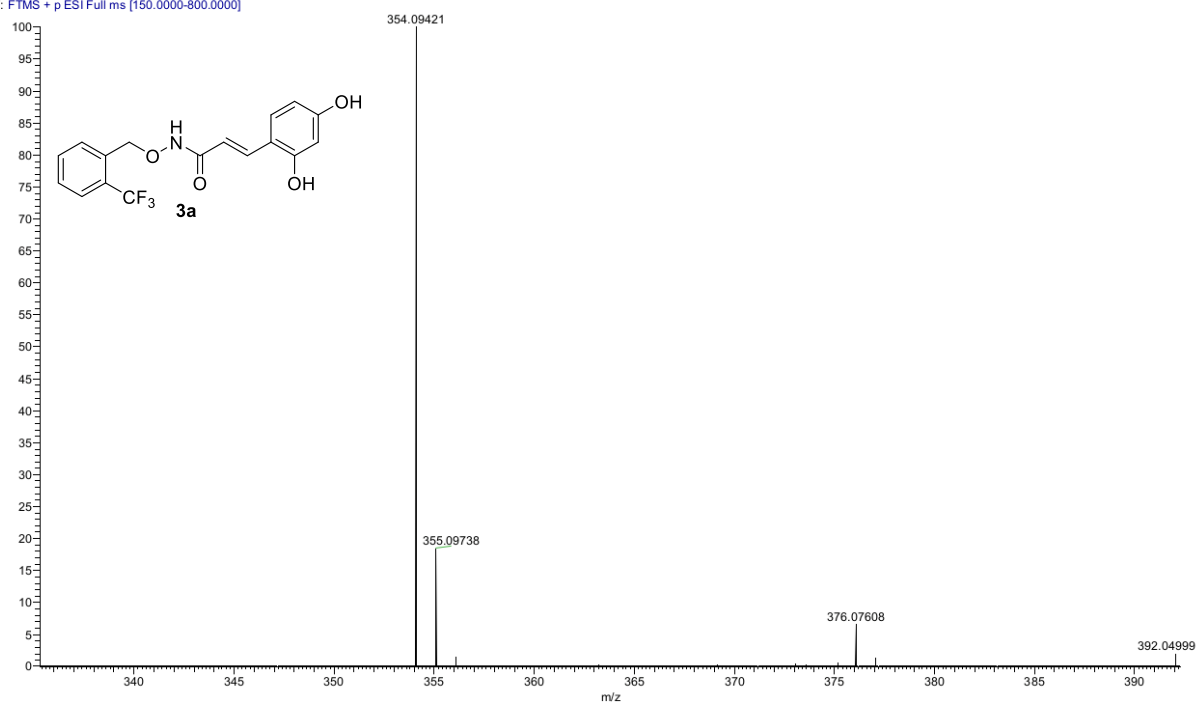

Spectrum S22: <sup>1</sup>H-NMR spectrum of compound **3b**

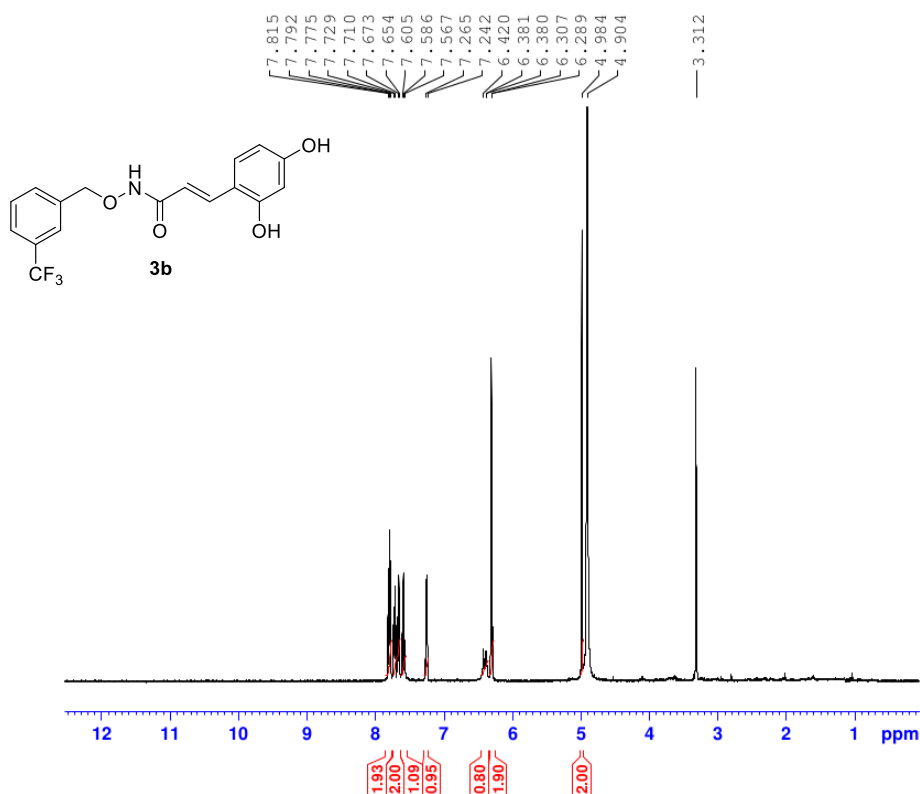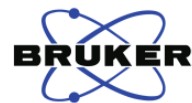

Current Data Parameters  
NAME EM05  
EXPNO 2  
PROCNO 1

F2 - Acquisition Parameters  
Date\_ 20221013  
Time 16.56 h  
INSTRUM spect  
PROBHD Z108618\_0601 (   
PULPROG zg30  
TD 65536  
SOLVENT MeOD  
NS 16  
DS 0  
SWH 6009.615 Hz  
FIDRES 0.183399 Hz  
AQ 5.4525952 sec  
RG 203  
DW 83.200 usec  
DE 13.02 usec  
TE 294.1 K  
D1 1.00000000 sec  
TD0 1  
SFO1 400.1324710 MHz  
NUC1 1H  
P0 5.00 usec  
P1 15.00 usec  
PLW1 18.62100029 W

F2 - Processing parameters  
SI 65536  
SF 400.1300069 MHz  
WDW no  
SSB 0  
LB 0 Hz  
GB 0  
PC 1.00

Spectrum S23: <sup>13</sup>C-NMR spectrum of compound **3b**

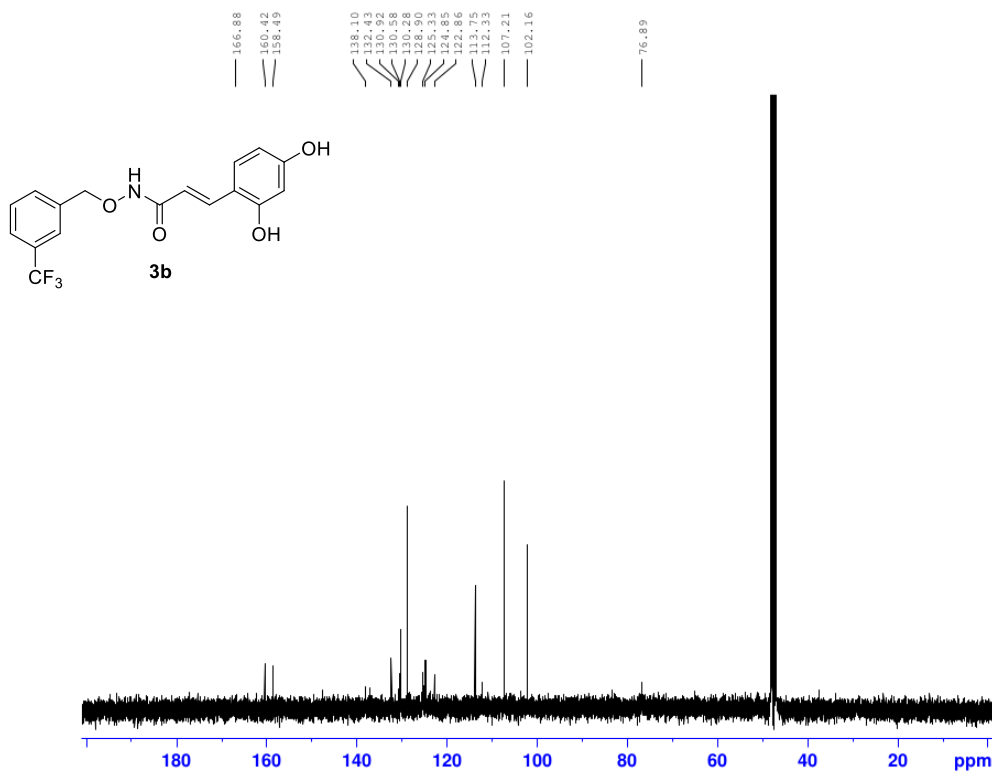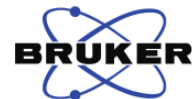

Current Data Parameters  
NAME EM05  
EXPNO 4  
PROCNO 1

F2 - Acquisition Parameters  
Date\_ 20230706  
Time 12.13 h  
INSTRUM spect  
PROBHD Z108618\_0601 (   
PULPROG zgpg30  
TD 65536  
SOLVENT MeOD  
NS 2418  
DS 4  
SWH 24038.461 Hz  
FIDRES 0.733596 Hz  
AQ 1.3631488 sec  
RG 203  
DW 20.800 usec  
DE 9.97 usec  
TE 299.3 K  
D1 2.00000000 sec  
D11 0.03000000 sec  
TD0 10  
SFO1 100.6228293 MHz  
NUC1 13C  
P0 3.33 usec  
P1 10.00 usec  
PLW1 38.91999817 W  
SFO2 400.1316005 MHz  
NUC2 1H  
CPDPRG2 waltz16  
PCPD2 90.00 usec  
PLW2 18.62100029 W  
PLW12 0.52265888 W  
PLW13 0.26195660 W

F2 - Processing parameters  
SI 32768  
SF 100.6127690 MHz  
WDW no  
SSB 0  
LB 0 Hz  
GB 0  
PC 1.40

## Spectrum S24: Mass spectrum of compound **3b**

EM05 #255 RT: 2.12 AV: 1 NL: 1.96E8  
T: FTMS + p ESI Full ms [250.0000-1200.0000]

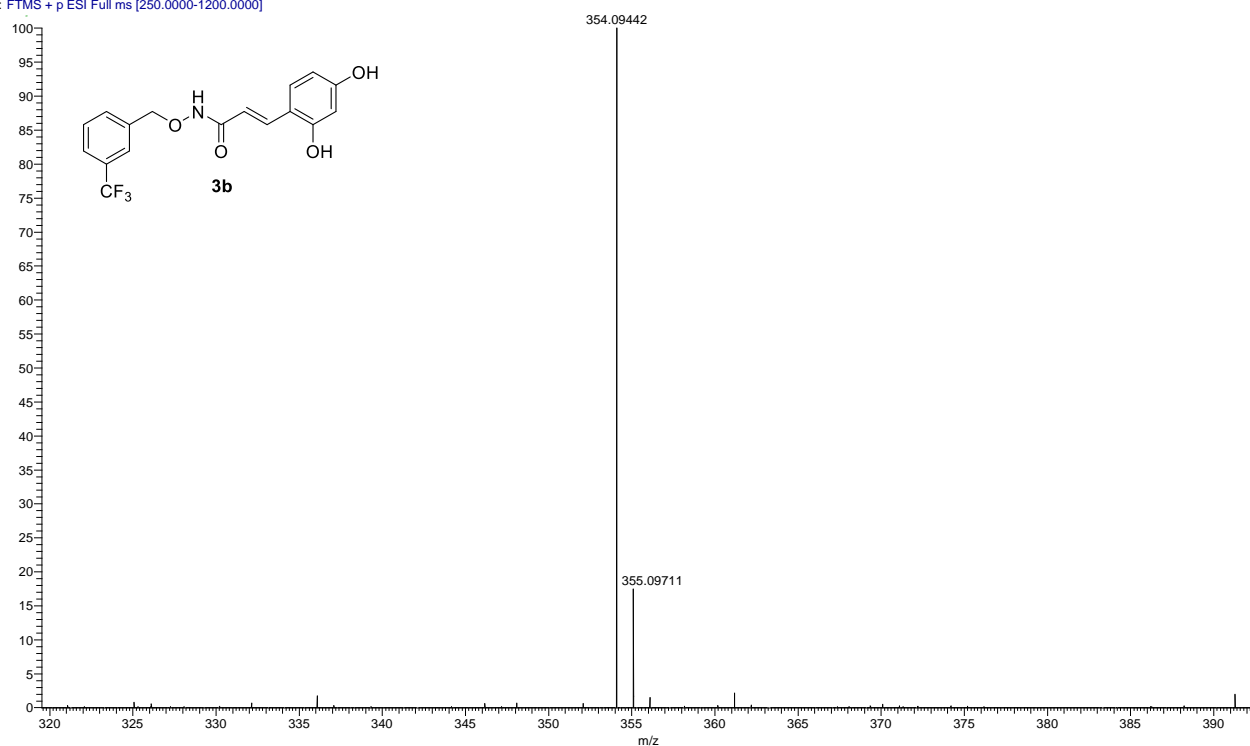



**Spectrum S25: <sup>1</sup>H-NMR spectrum of compound 3c**

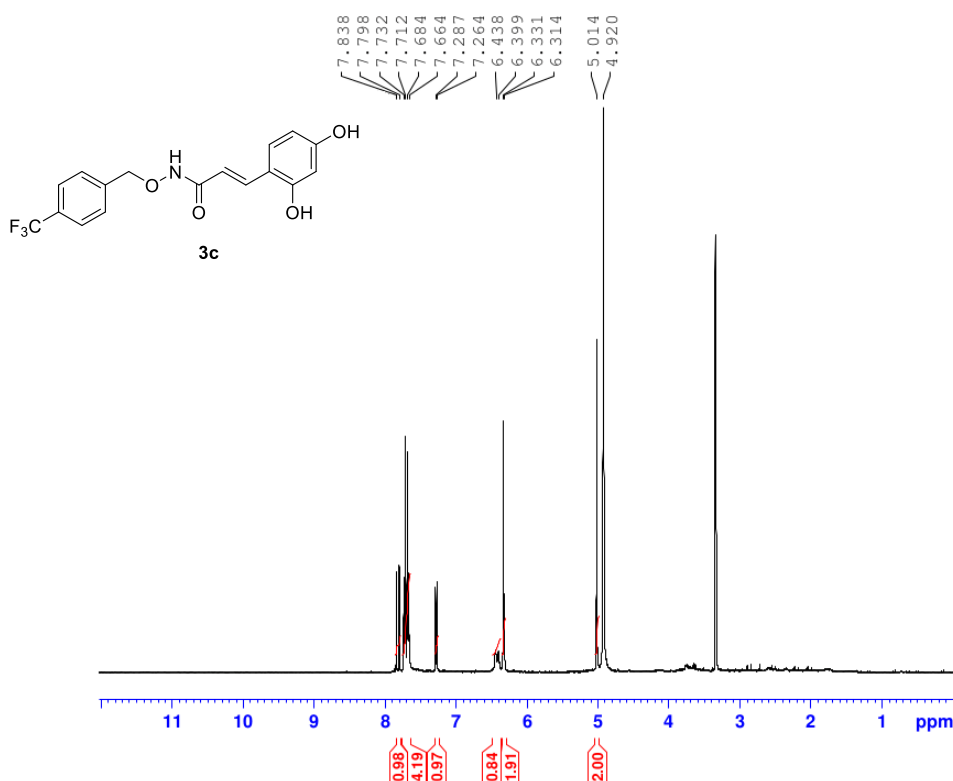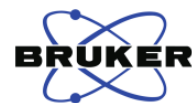

Current Data Parameters  
NAME EM06  
EXPNO 1  
PROCNO 1

F2 - Acquisition Parameters  
Date\_ 20220923  
Time 16.15 h  
INSTRUM spect  
PROBHD Z108618\_0601 (  
PULPROG zg30  
TD 65536  
SOLVENT MeOD  
NS 32  
DS 0  
SWH 6009.615 Hz  
FIDRES 0.183399 Hz  
AQ 5.4525952 sec  
RG 203  
DW 83.200 usec  
DE 13.02 usec  
TE 0 K  
D1 1.00000000 sec  
TD0 1  
SFO1 400.1324710 MHz  
NUC1 1H  
P0 5.00 usec  
P1 15.00 usec  
PLW1 18.62100029 W

F2 - Processing parameters  
SI 65536  
SF 400.1299963 MHz  
WDW no  
SSB 0  
LB 0 Hz  
GB 0  
PC 1.00

**Spectrum S26: <sup>13</sup>C-NMR spectrum of compound 3c**

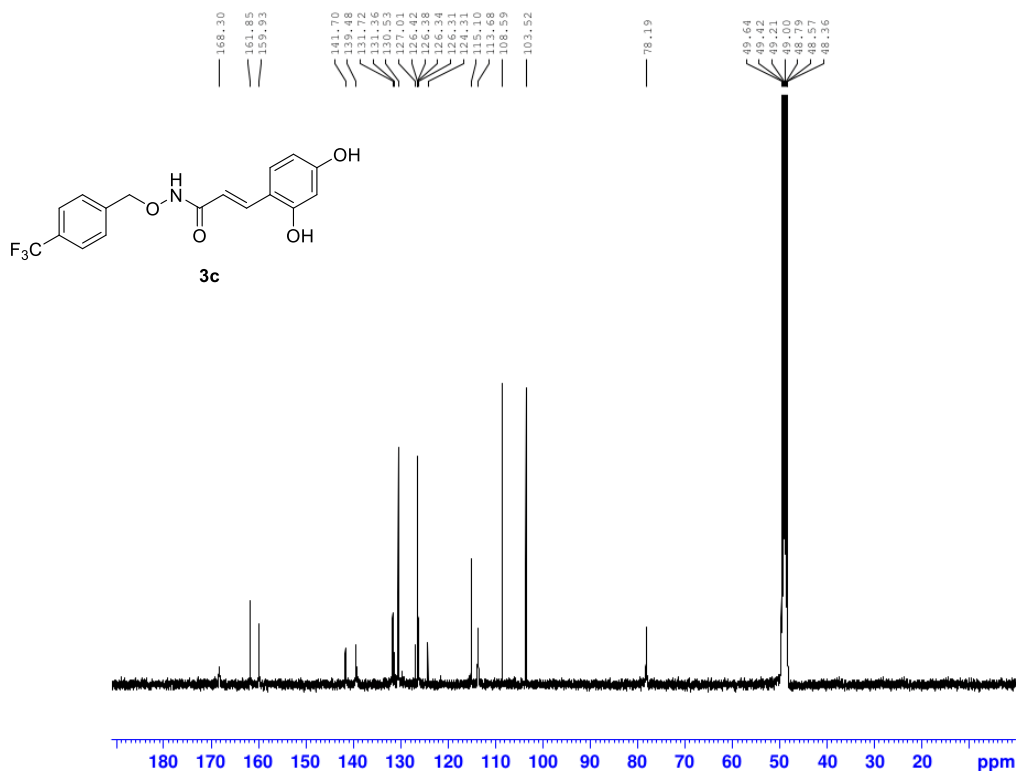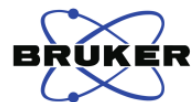

Current Data Parameters  
NAME EM06  
EXPNO 5  
PROCNO 1

F2 - Acquisition Parameters  
Date\_ 20230314  
Time 8.48 h  
INSTRUM spect  
PROBHD Z108618\_0601 (  
PULPROG zgpg30  
TD 65536  
SOLVENT MeOD  
NS 15622  
DS 4  
SWH 24038.461 Hz  
FIDRES 0.733596 Hz  
AQ 1.3631488 sec  
RG 203  
DW 20.800 usec  
DE 9.97 usec  
TE 295.5 K  
D1 2.00000000 sec  
D11 0.03000000 sec  
TD0 10  
SFO1 100.6228293 MHz  
NUC1 13C  
P0 3.33 usec  
P1 10.00 usec  
PLW1 38.91999817 W  
SFO2 400.1316005 MHz  
NUC2 1H  
CPDPRG[2] waltz16  
PCPD2 90.00 usec  
PLW2 18.62100029 W  
PLW12 0.52265888 W  
PLW13 0.26195660 W

F2 - Processing parameters  
SI 32768  
SF 100.6126277 MHz  
WDW EM  
SSB 0  
LB 1.00 Hz  
GB 0  
PC 1.40

## Spectrum S27: Mass spectrum of compound 3c

EM06 #16 RT: 0.16 AV: 1 NL: 2.76E7  
T: FTMS + p ESI Full ms [250.0000-1200.0000]

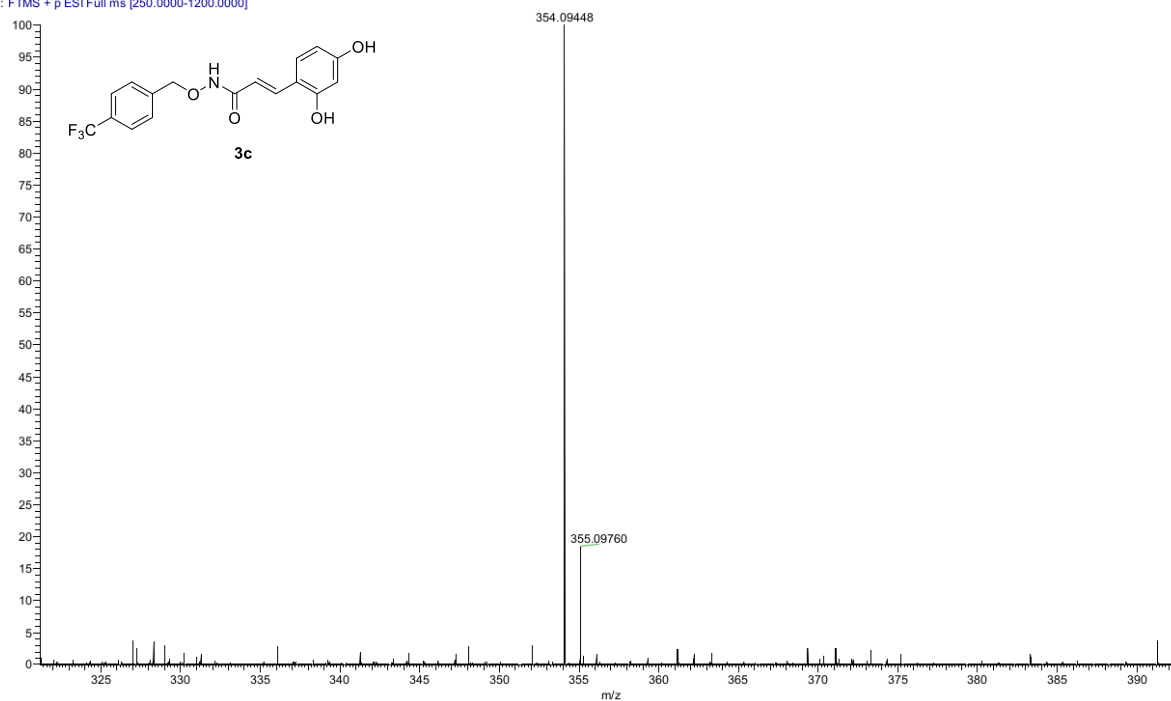

# Spectrum S28: <sup>1</sup>H-NMR spectrum of compound 4a

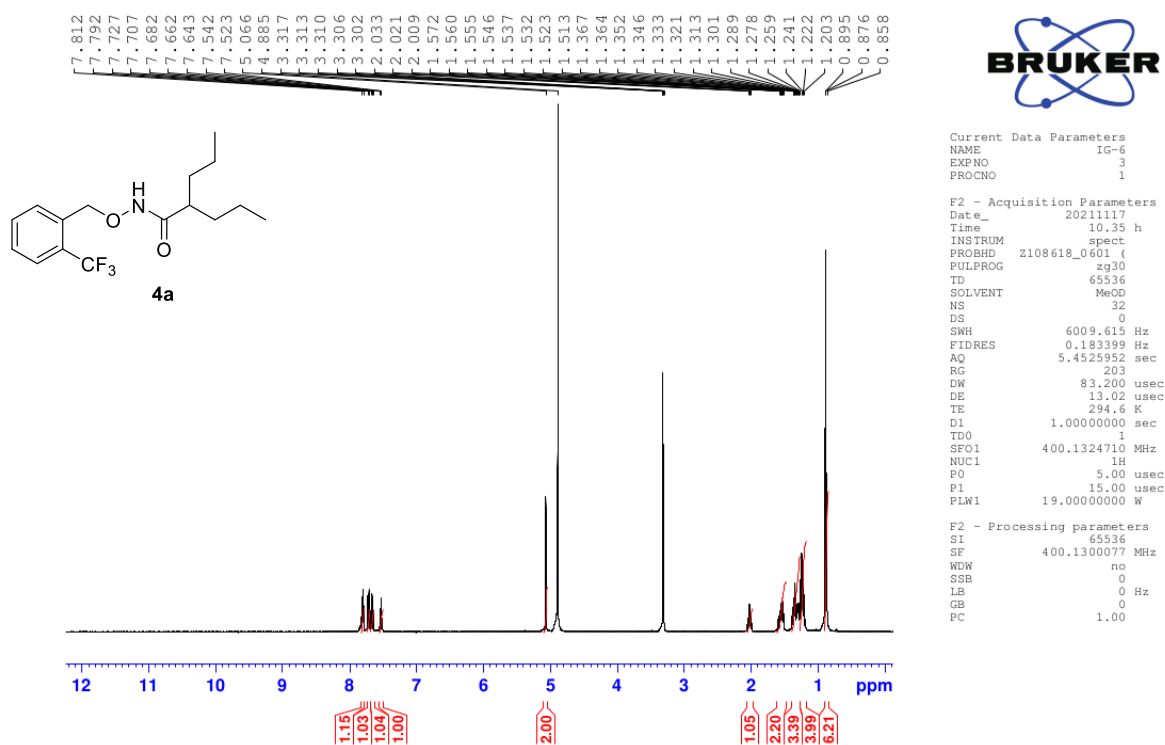

# Spectrum S29: <sup>13</sup>C-NMR spectrum of compound 4a

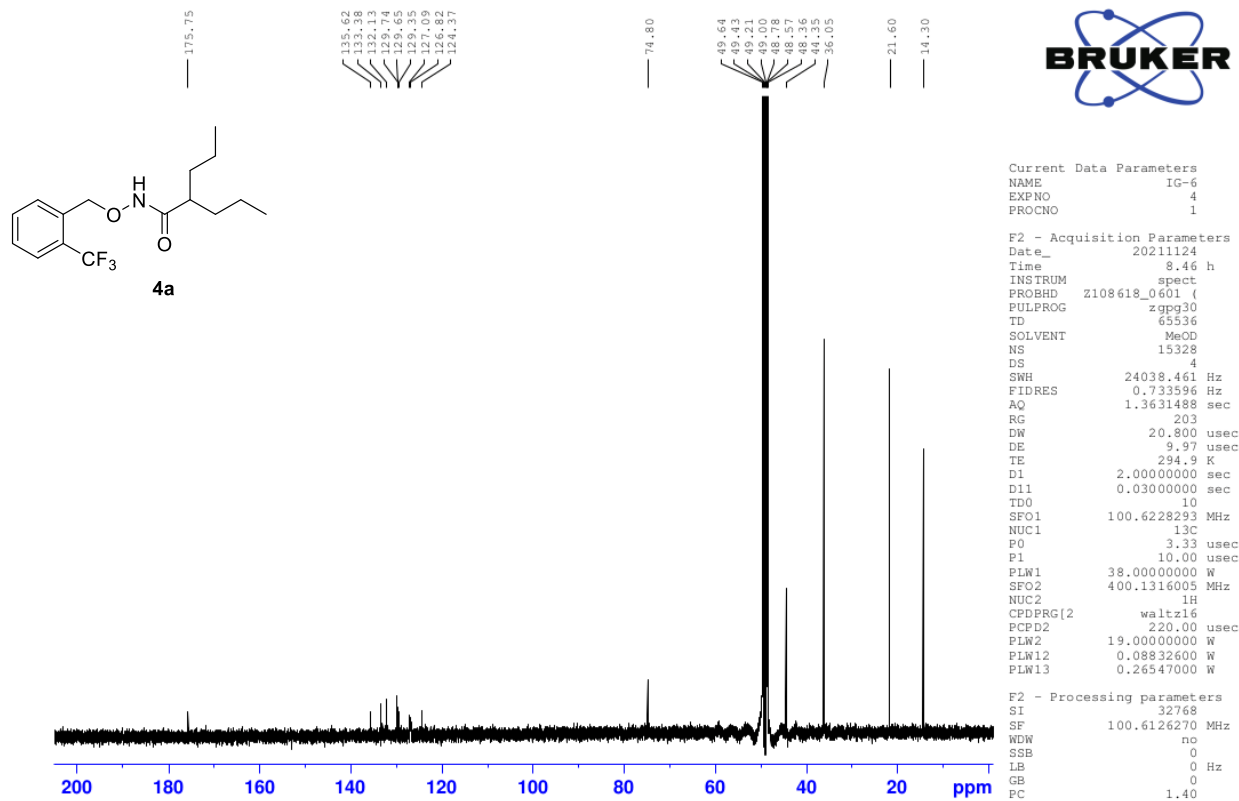

**Spectrum S30:** Mass spectrum of compound **4a**

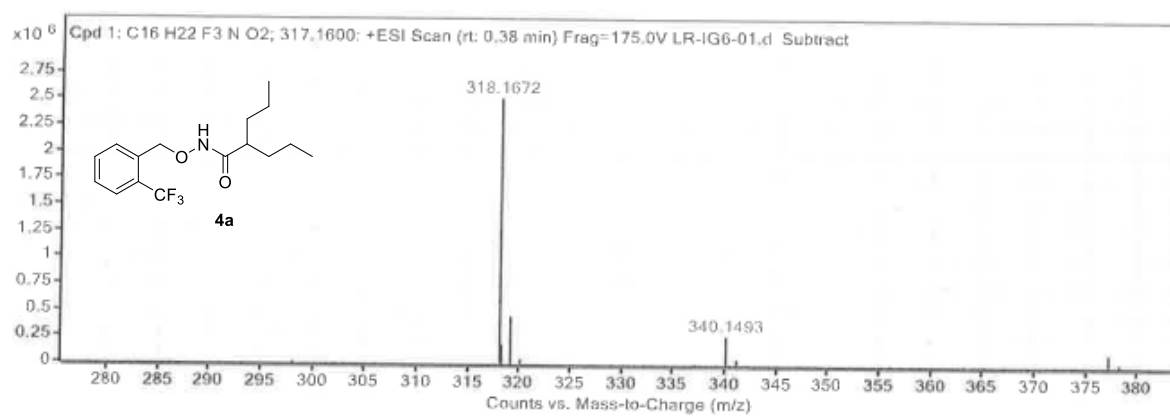

Spectrum S31:  $^1\text{H}$ -NMR spectrum of compound **4b**

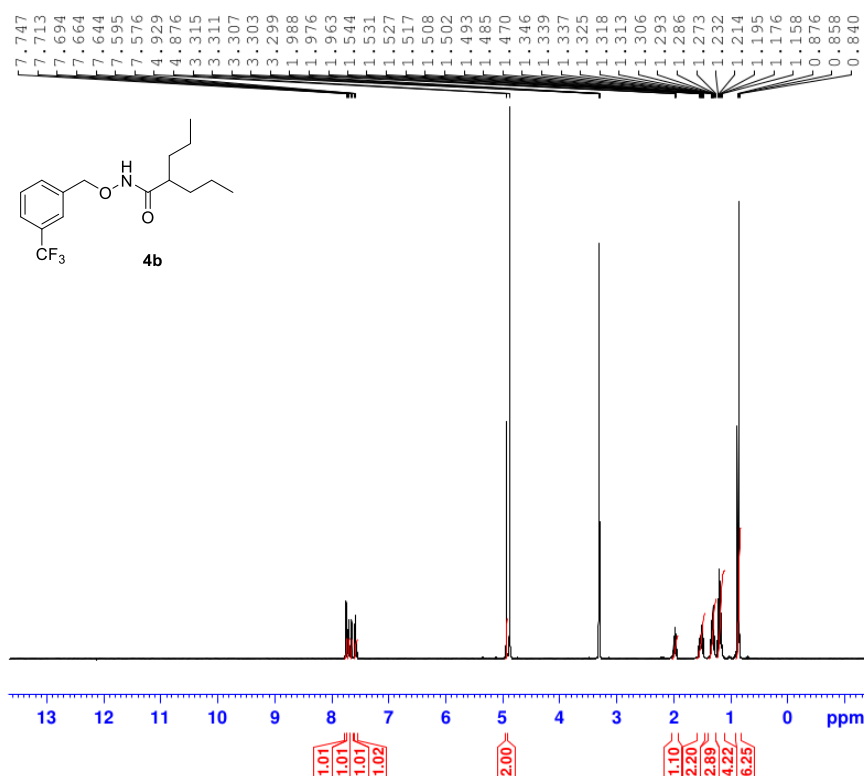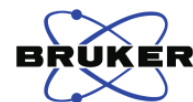

Current Data Parameters  
NAME IG-5  
EXPNO 3  
PROCNO 1

F2 - Acquisition Parameters  
Date\_ 20211022  
Time 16.35 h  
INSTRUM spect  
PROBHD Z108618\_0601 (   
PULPROG zg30  
TD 65536  
SOLVENT MeOD  
NS 32  
DS 0  
SWH 6009.615 Hz  
FIDRES 0.183399 Hz  
AQ 5.4525952 sec  
RG 203  
DW 83.200 usec  
DE 13.02 usec  
TE 295.3 K  
D1 1.00000000 sec  
TD0 1  
SF01 400.1324710 MHz  
NUC1 1H  
P0 5.00 usec  
P1 15.00 usec  
PLW1 19.00000000 W

F2 - Processing parameters  
SI 65536  
SF 400.1300085 MHz  
WDW no  
SSB 0  
LB 0 Hz  
GB 0  
PC 1.00

Spectrum S32:  $^{13}\text{C}$ -NMR spectrum of compound **4b**

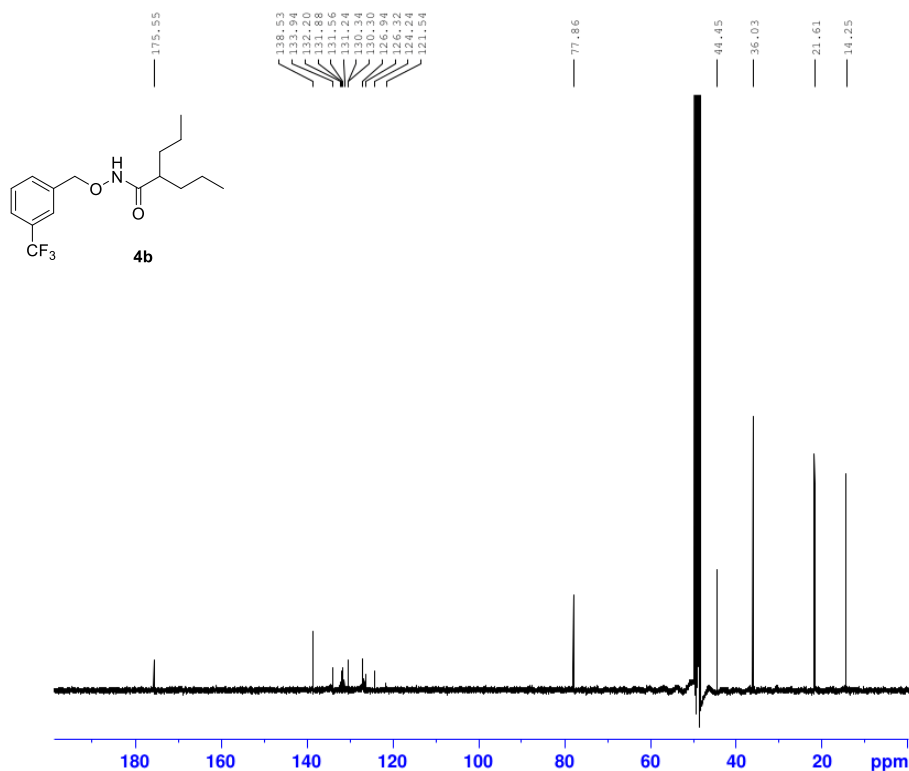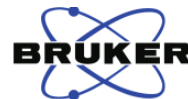

Current Data Parameters  
NAME IG-5  
EXPNO 4  
PROCNO 1

F2 - Acquisition Parameters  
Date\_ 20211102  
Time 8.47 h  
INSTRUM spect  
PROBHD Z108618\_0601 (   
PULPROG zgpg30  
TD 65536  
SOLVENT MeOD  
NS 92228  
DS 4  
SWH 24038.461 Hz  
FIDRES 0.733596 Hz  
AQ 1.3631488 sec  
RG 203  
DW 20.800 usec  
DE 9.97 usec  
TE 295.9 K  
D1 2.00000000 sec  
D11 0.03000000 sec  
TD0 10  
SF01 100.6228293 MHz  
NUC1 13C  
P0 3.33 usec  
P1 10.00 usec  
PLW1 38.00000000 W  
SF02 400.1316005 MHz  
NUC2 1H  
CPDPRG2 waltz16  
PCPD2 220.00 usec  
PLW2 19.00000000 W  
PLW12 0.08832600 W  
PLW13 0.26547000 W

F2 - Processing parameters  
SI 32768  
SF 100.6126286 MHz  
WDW no  
SSB 0  
LB 0 Hz  
GB 0  
PC 1.40

**Spectrum S33:** Mass spectrum of compound **4b**

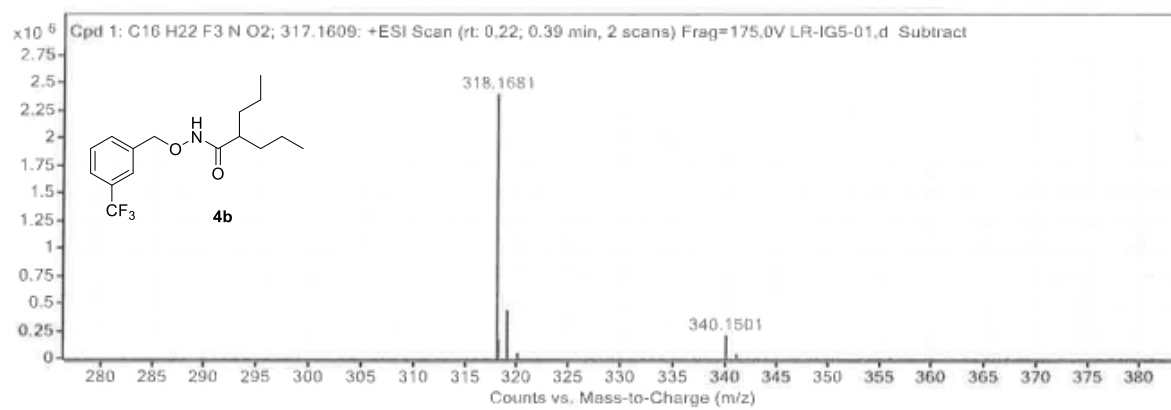

### Spectrum S34: <sup>1</sup>H-NMR spectrum of compound 4c

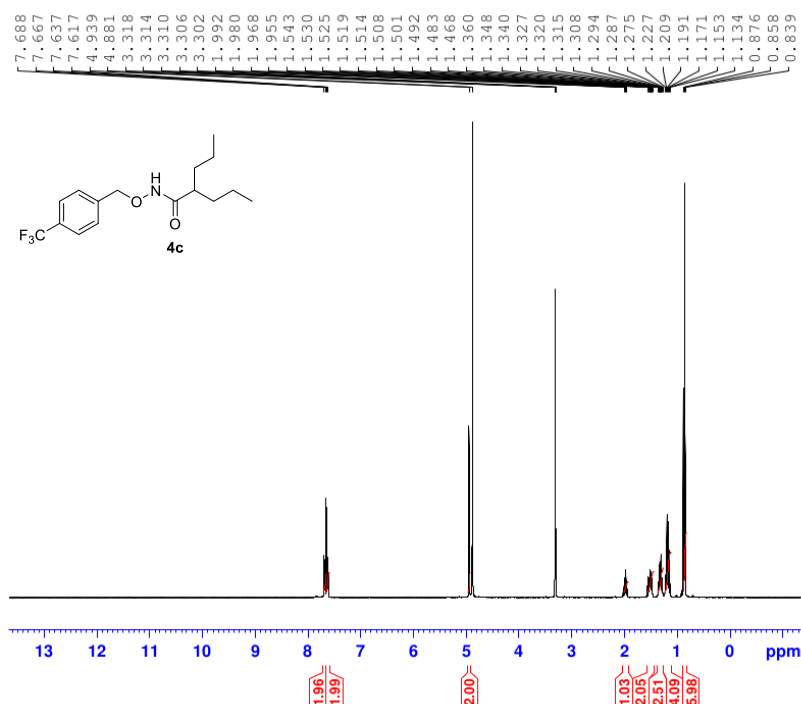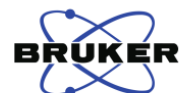

Current Data Parameters  
NAME IG-4  
EXPNO 2  
PROCNO 1

F2 - Acquisition Parameters  
Date\_ 20211011  
Time 9.39 h  
INSTRUM spect  
PROBHD Z108618\_0601 ( )  
PULPROG zg30  
TD 65536  
SOLVENT MeOD  
NS 32  
DS 0  
SWH 6009.615 Hz  
FIDRES 0.183399 Hz  
AQ 5.4525952 sec  
RG 203  
DW 83.200 usec  
DE 13.02 usec  
TE 295.1 K  
D1 1.00000000 sec  
TDO 1  
SFO1 400.1324710 MHz  
NUC1 1H  
P0 5.00 usec  
P1 15.00 usec  
PLW1 19.00000000 W

F2 - Processing parameters  
SI 65536  
SF 400.1300075 MHz  
WDW no  
SSB 0  
LB 0 Hz  
GB 0  
PC 1.00

### Spectrum S35: <sup>13</sup>C-NMR spectrum of compound 4c

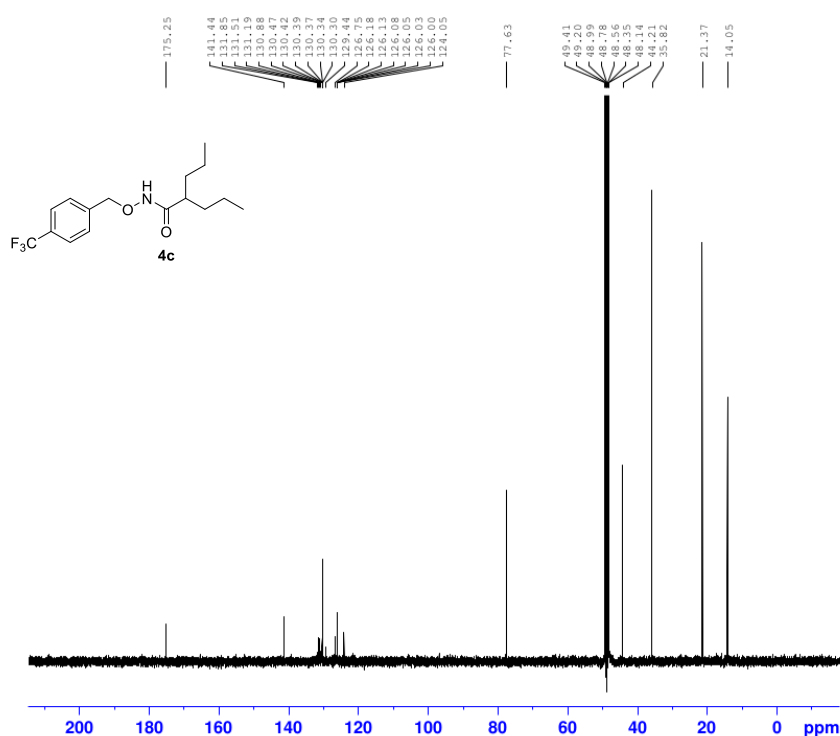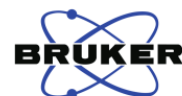

Current Data Parameters  
NAME IG-4  
EXPNO 3  
PROCNO 1

F2 - Acquisition Parameters  
Date\_ 20211028  
Time 14.47 h  
INSTRUM spect  
PROBHD Z108618\_0601 ( )  
PULPROG zgpg30  
TD 65536  
SOLVENT MeOD  
NS 1542  
DS 4  
SWH 24038.461 Hz  
FIDRES 0.733596 Hz  
AQ 1.3631488 sec  
RG 203  
DW 20.800 usec  
DE 9.97 usec  
TE 295.4 K  
D1 2.00000000 sec  
D11 0.03000000 sec  
TDO 10  
SFO1 100.6228293 MHz  
NUC1 13C  
P0 3.33 usec  
P1 10.00 usec  
PLW1 38.00000000 W  
SFO2 400.1316005 MHz  
NUC2 1H  
CPDPRG2 waltz16  
PCPD2 220.00 usec  
PLW2 19.00000000 W  
PLW12 0.08832600 W  
PLW13 0.26547000 W

F2 - Processing parameters  
SI 32768  
SF 100.6126503 MHz  
WDW no  
SSB 0  
LB 0 Hz  
GB 0  
PC 1.40

### Spectrum S36: Mass spectrum of compound 4c

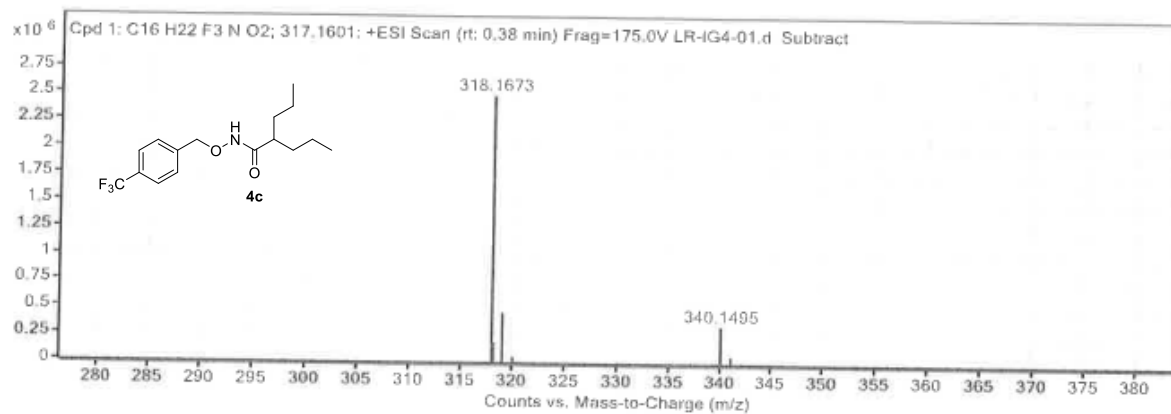



# Spectrum S37: <sup>1</sup>H-NMR spectrum of compound 5a

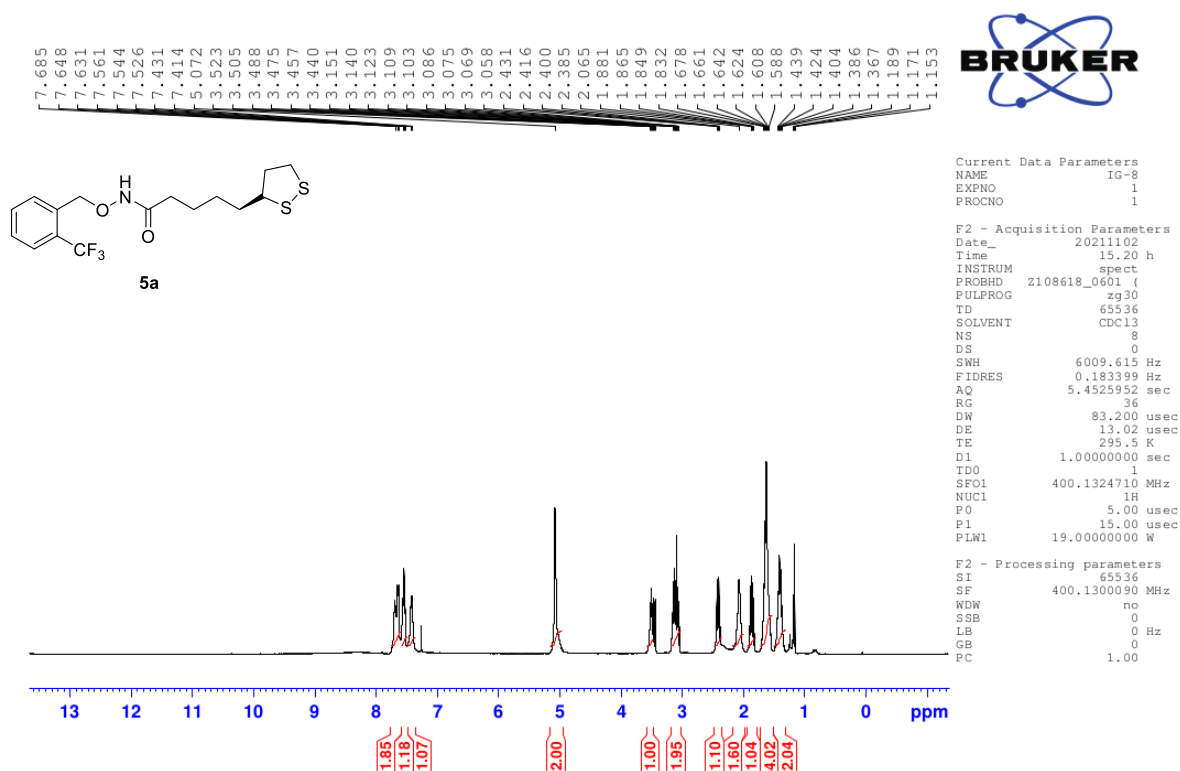

# Spectrum S38: <sup>13</sup>C-NMR spectrum of compound 5a

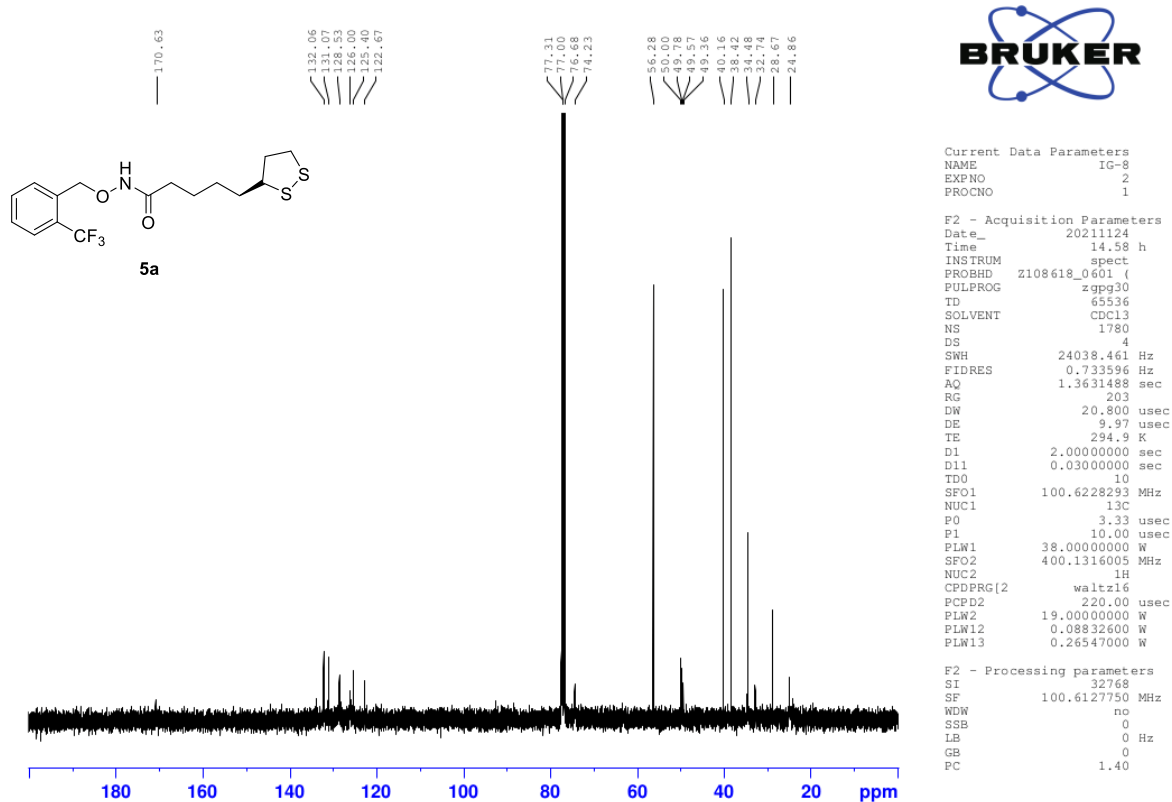

**Spectrum S39:** Mass spectrum of compound **5a**

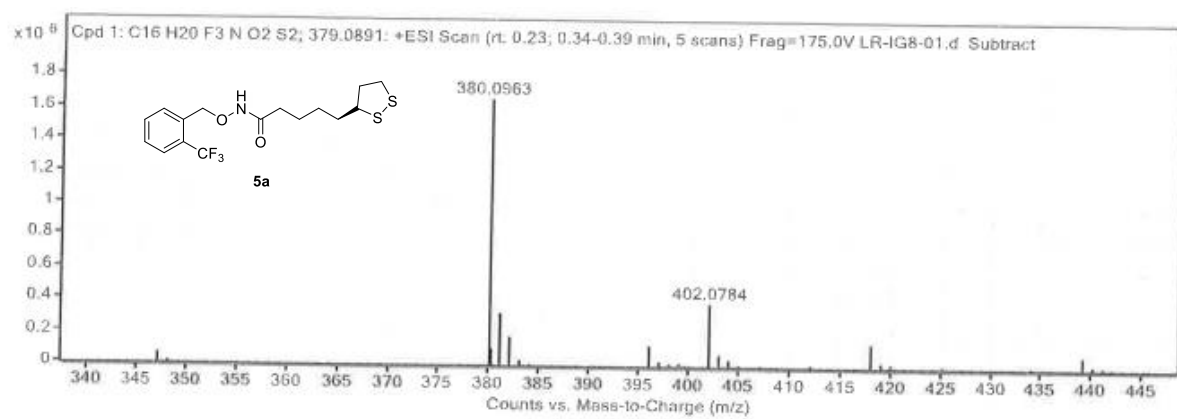

**Spectrum S40:**  $^1\text{H}$ -NMR spectrum of compound **5b**

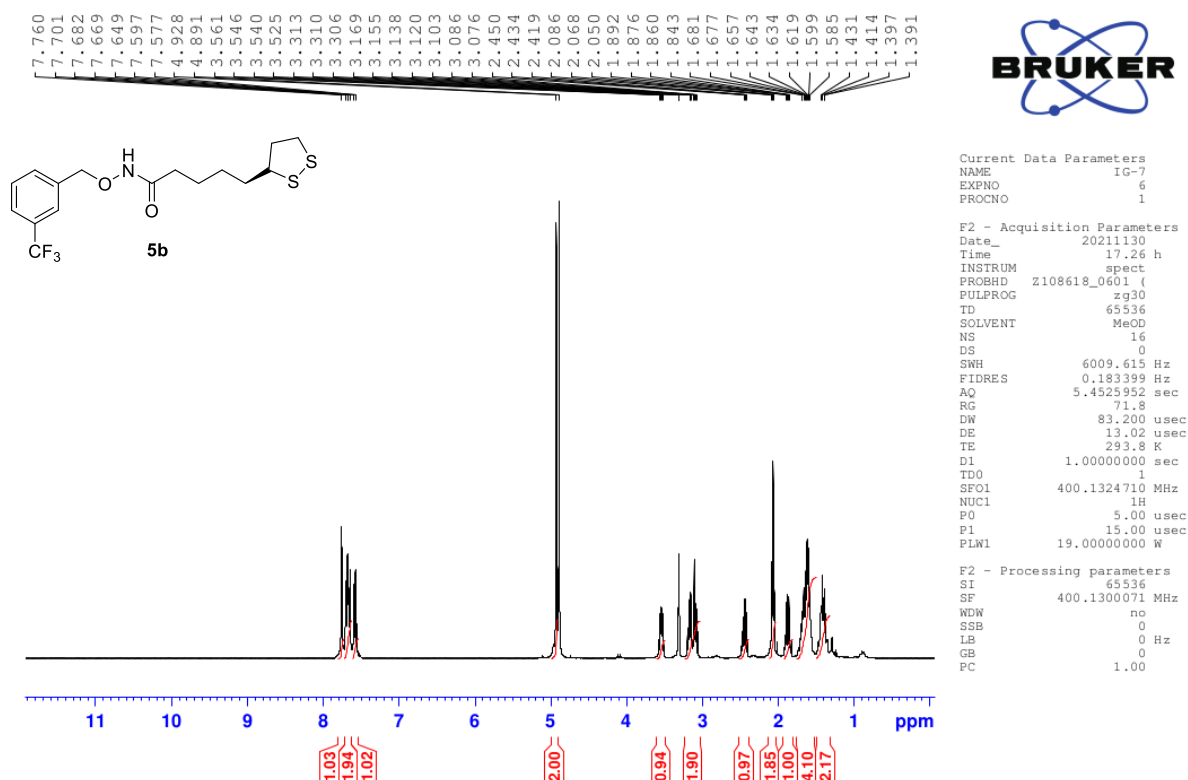

**Spectrum S41:**  $^{13}\text{C}$ -NMR spectrum of compound **5b**

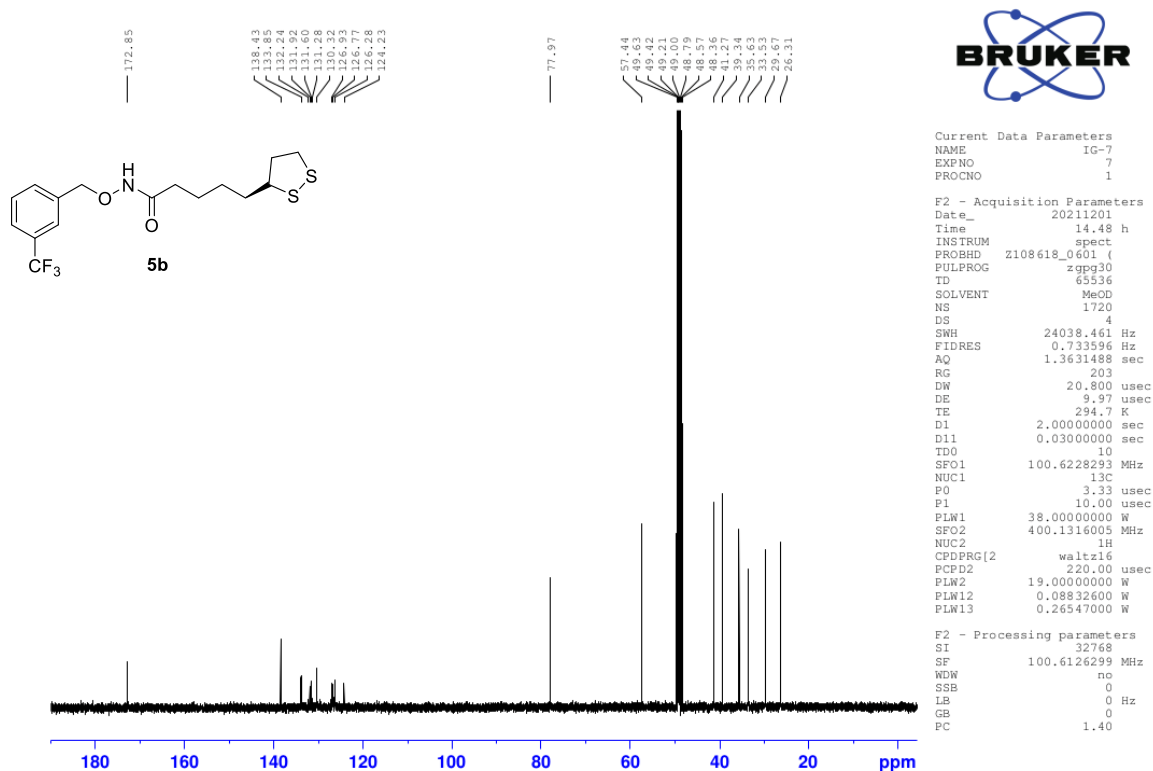

**Spectrum S42:** Mass spectrum of compound **5b**

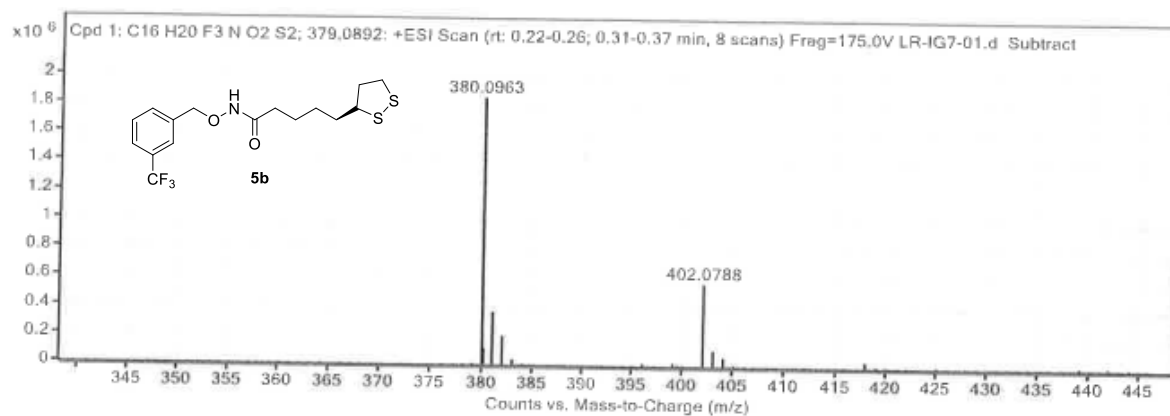

**Spectrum S43:** <sup>1</sup>H-NMR spectrum of compound **5c**

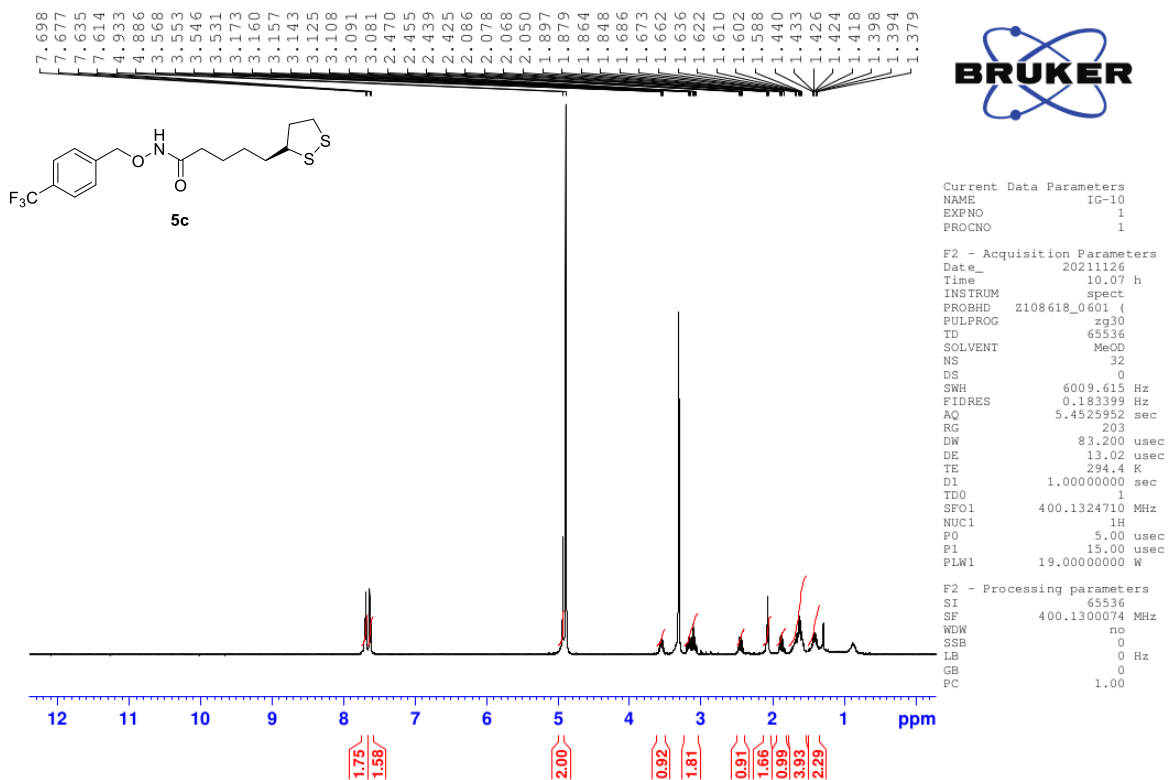

**Spectrum S44:**  $^{13}\text{C}$ -NMR spectrum of compound **5c**

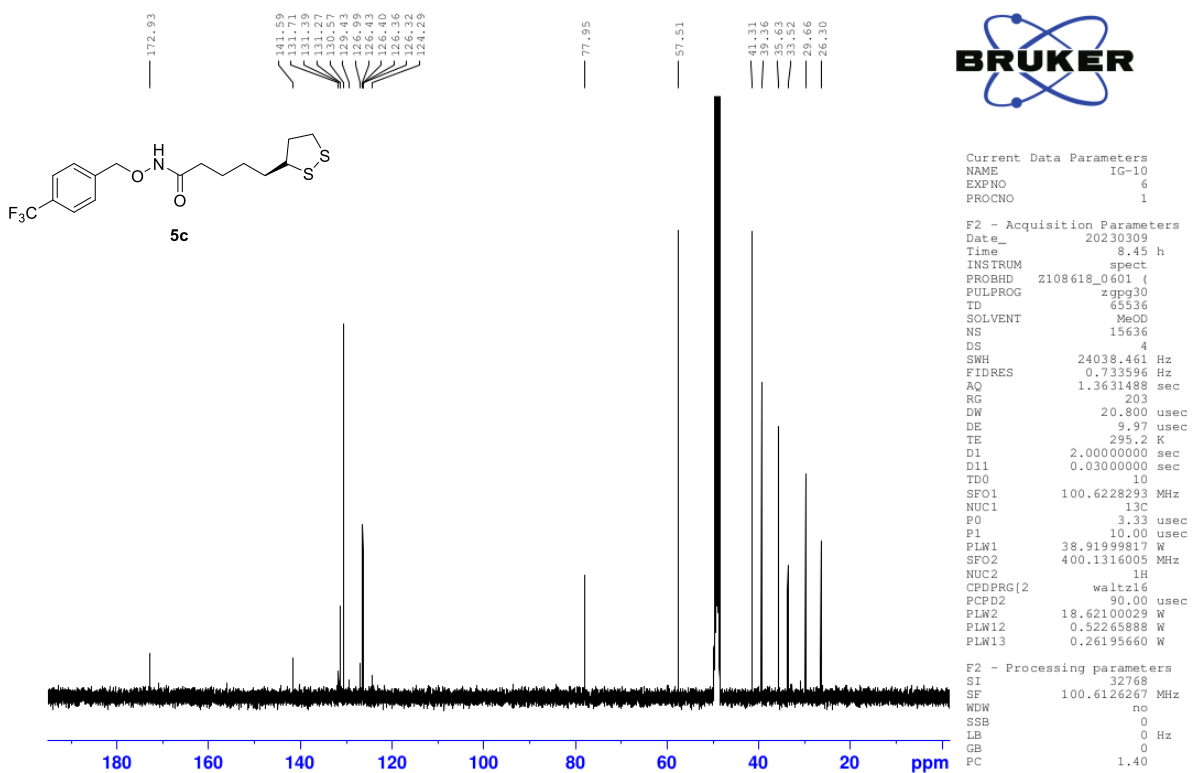

**Spectrum S45:** Mass spectrum of compound **5c**

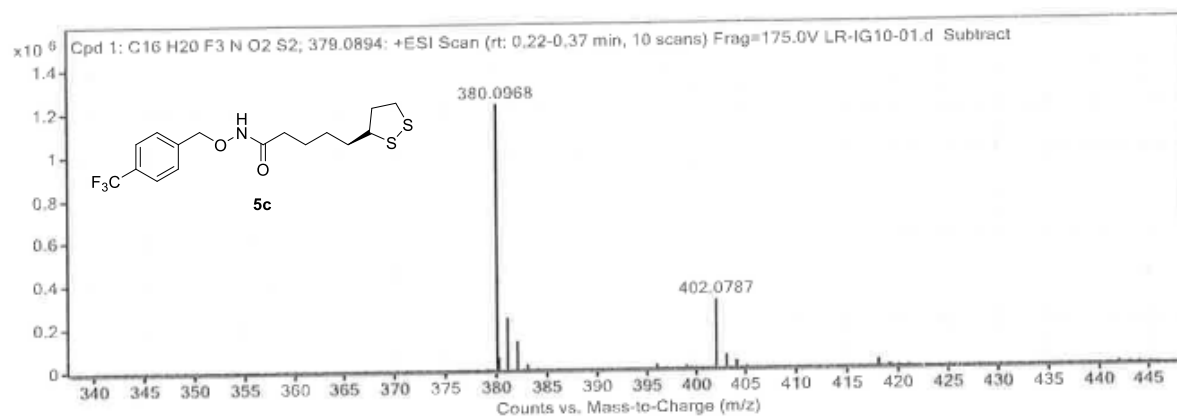

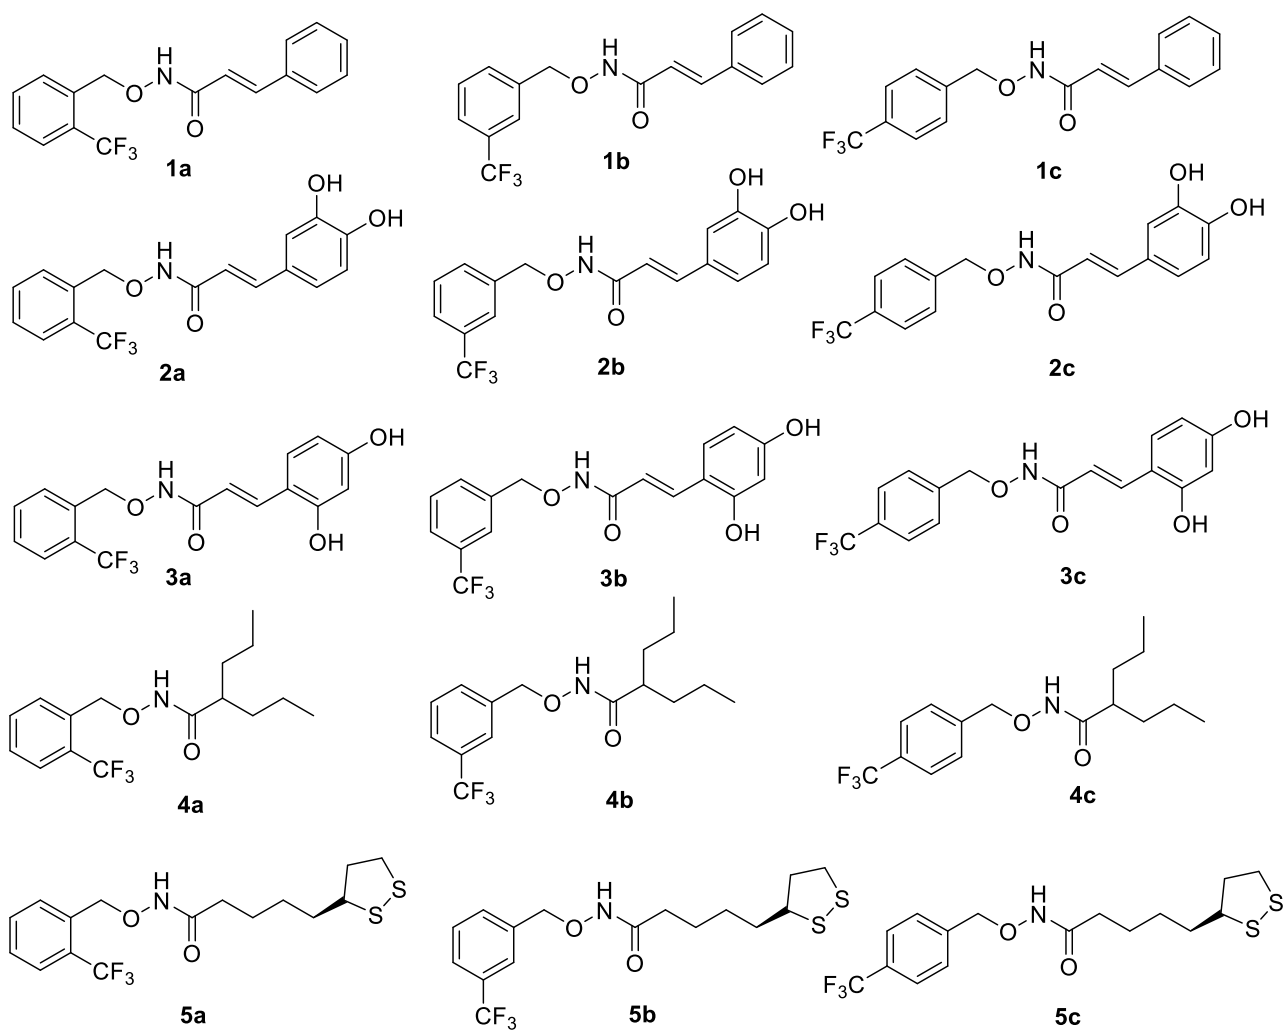

**Figure S1** Chemical structure of all synthesized compounds.

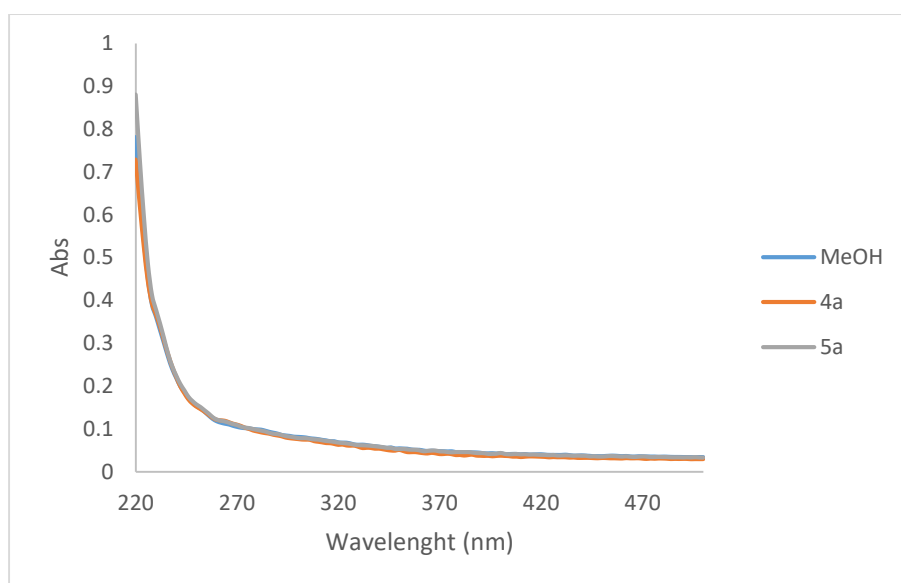

**Figure S2** UV Spectra of MeOH, compound **4a** and **5a**.



**A**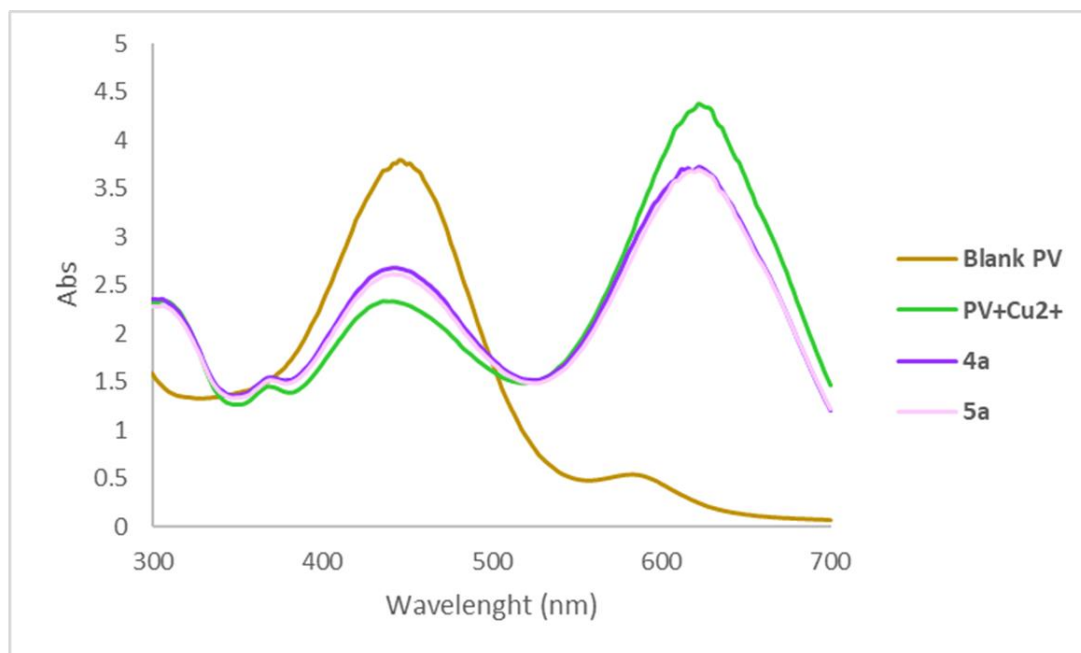**B**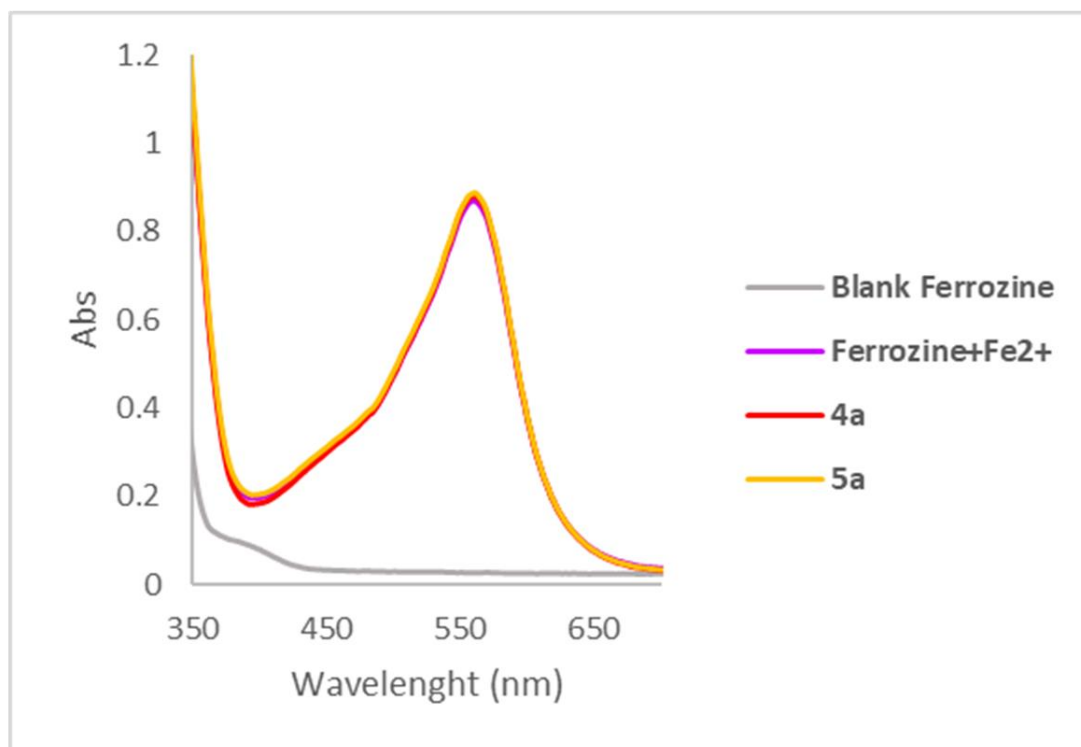

**Figure S3** Colorimetric metal chelation study of compounds **4a** and **5a**. **A** Derivatives **4a** e **5a** in presence of PV and Cu<sup>2+</sup>; **B** Derivatives **4a** e **5a** in presence of Ferrozine and Fe<sup>2+</sup>.

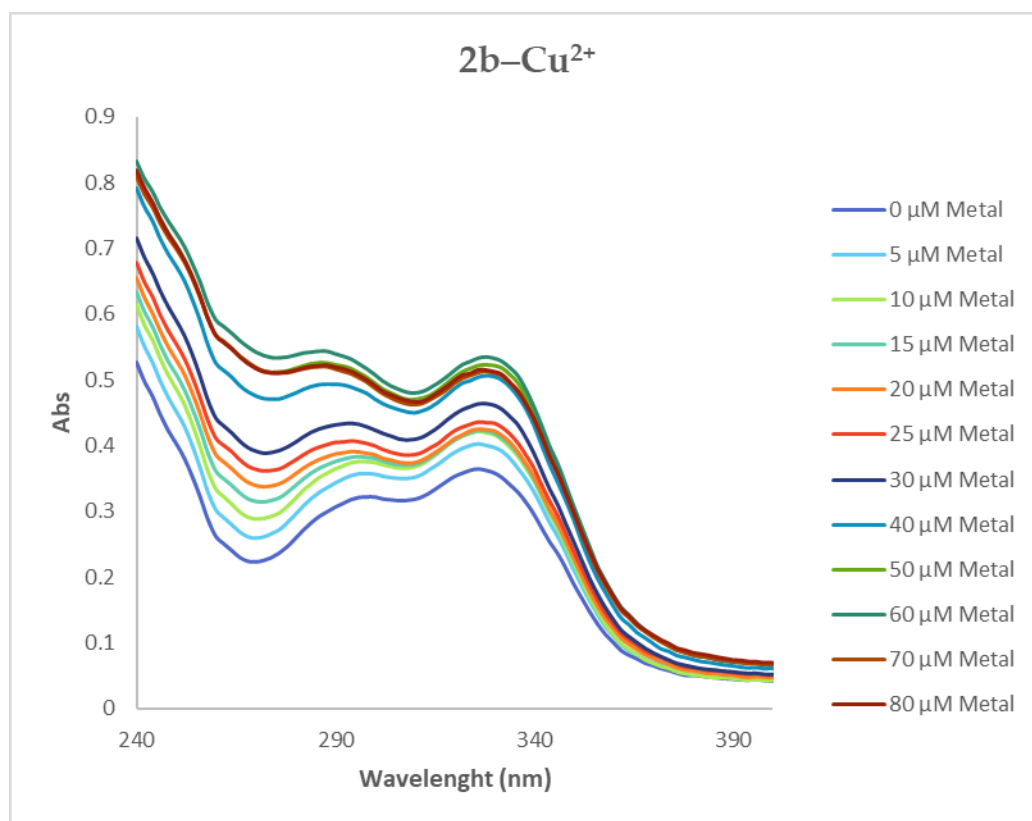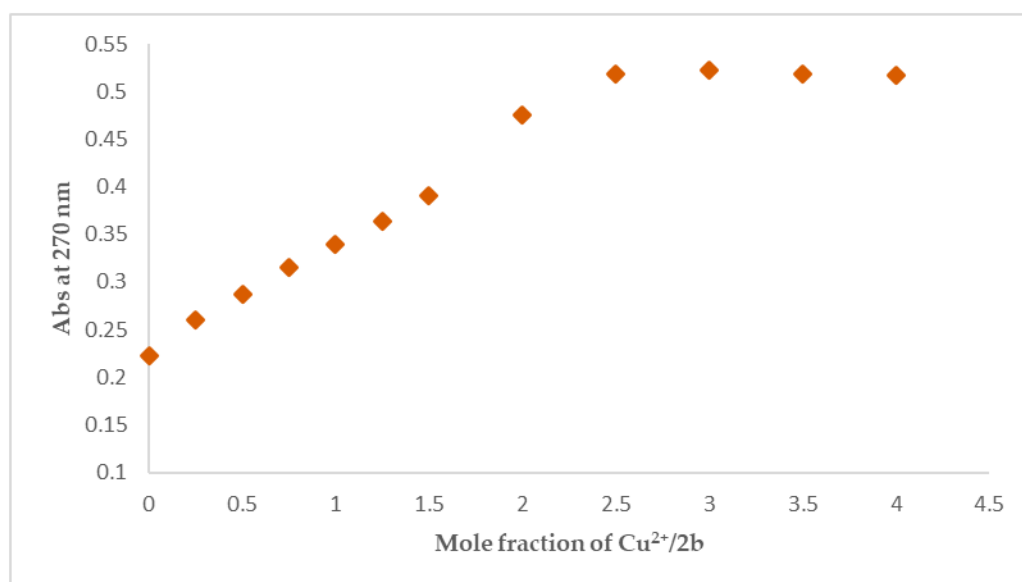

**Figure S4** UV Spectra of compound **2c** with increased concentration of Cu<sup>2+</sup> and molar fraction of the complex.

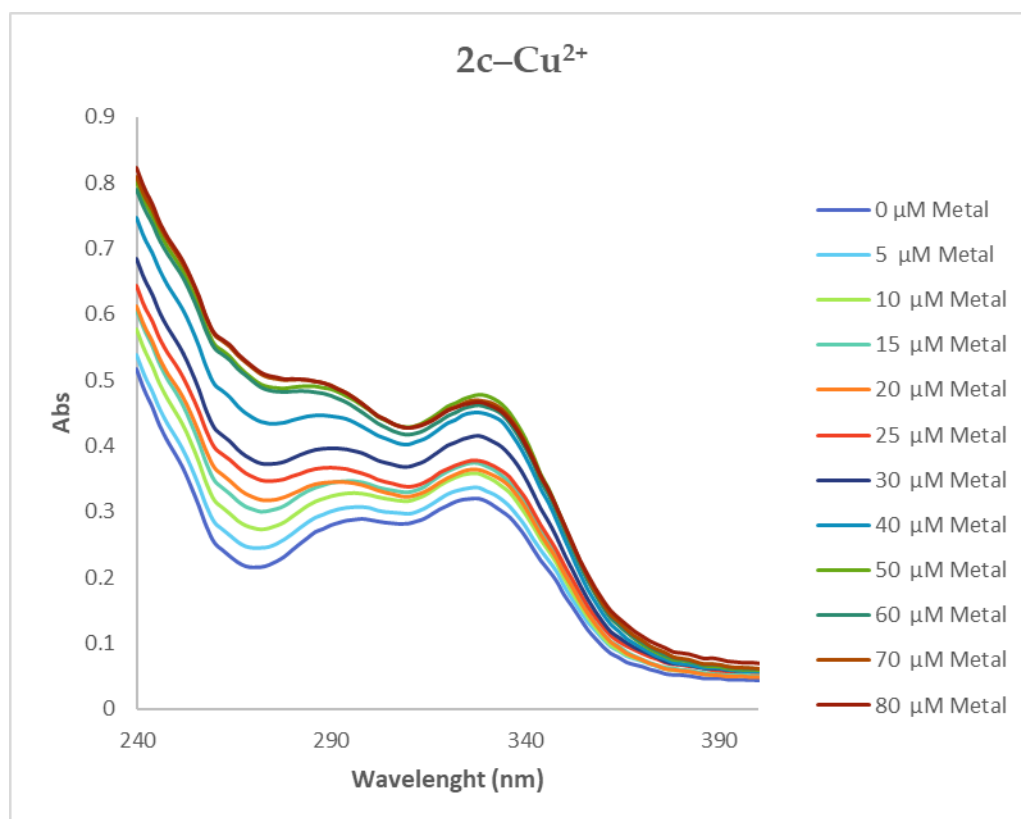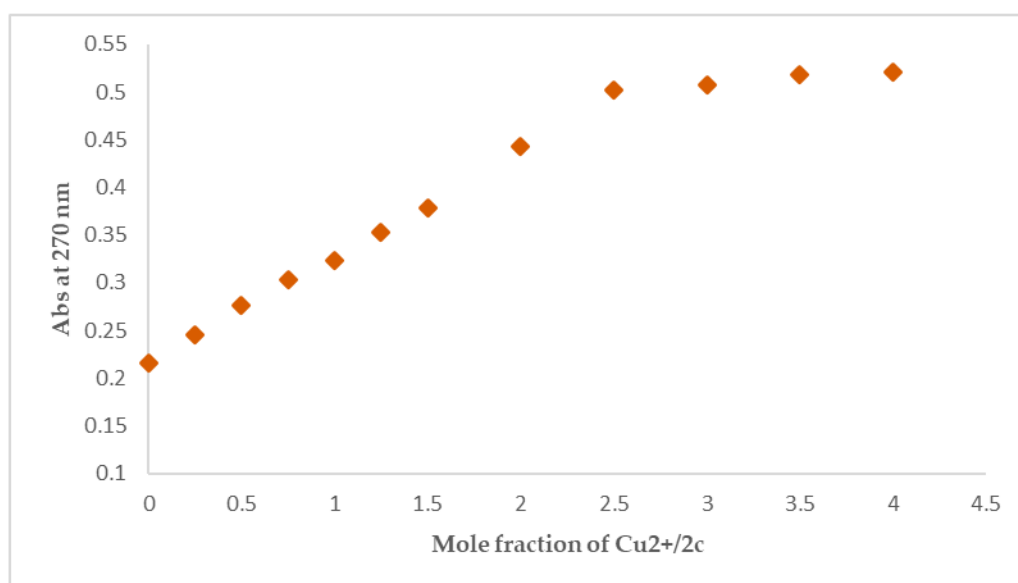

**Figure S5** UV Spectra of compound **2c** with increased concentration of Cu<sup>2+</sup> and molar fraction of the complex.

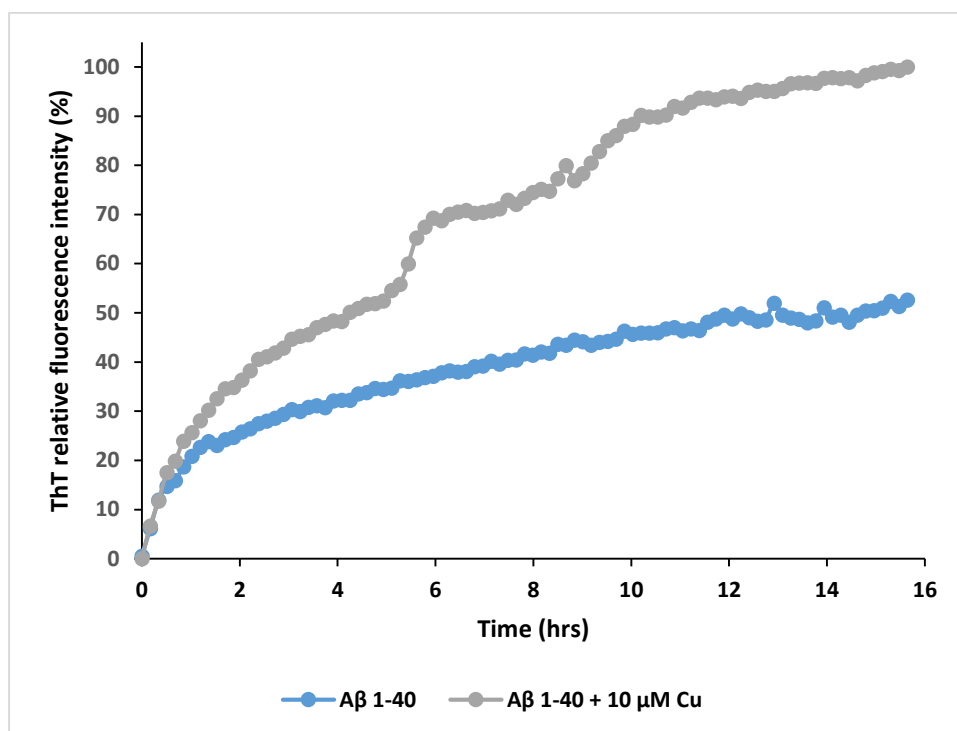

**Figure S6** Representative aggregation kinetics curves of A $\beta_{1-40}$  (10  $\mu$ M) in the absence (blue) or presence (grey) of 10  $\mu$ M of Cu<sup>2+</sup>.

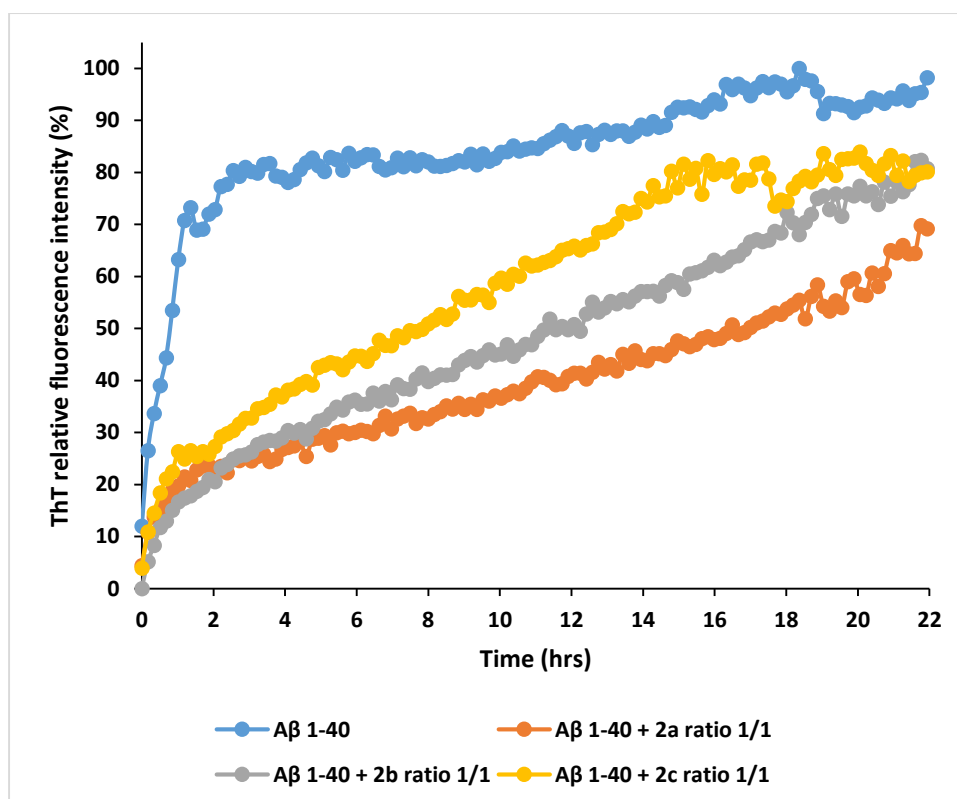

**Figure S7** Representative aggregation kinetics curves of A $\beta_{1-40}$  (10  $\mu$ M) in the absence (blue) or presence (orange, grey and yellow, respectively) of compounds **2a-c** (10  $\mu$ M).

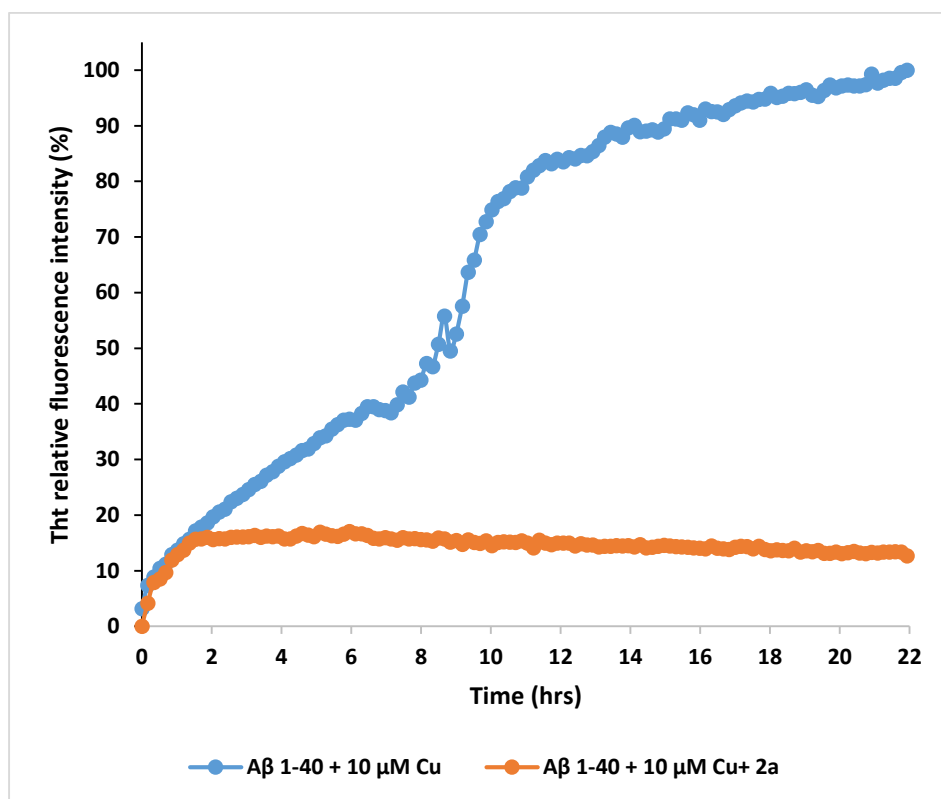

**Figure S8** Representative aggregation kinetics curves of Aβ<sub>1-40</sub> (10 μM) with 10 μM of Cu<sup>2+</sup> in the absence (blue) or presence (orange) of compound **2a** (10 μM).

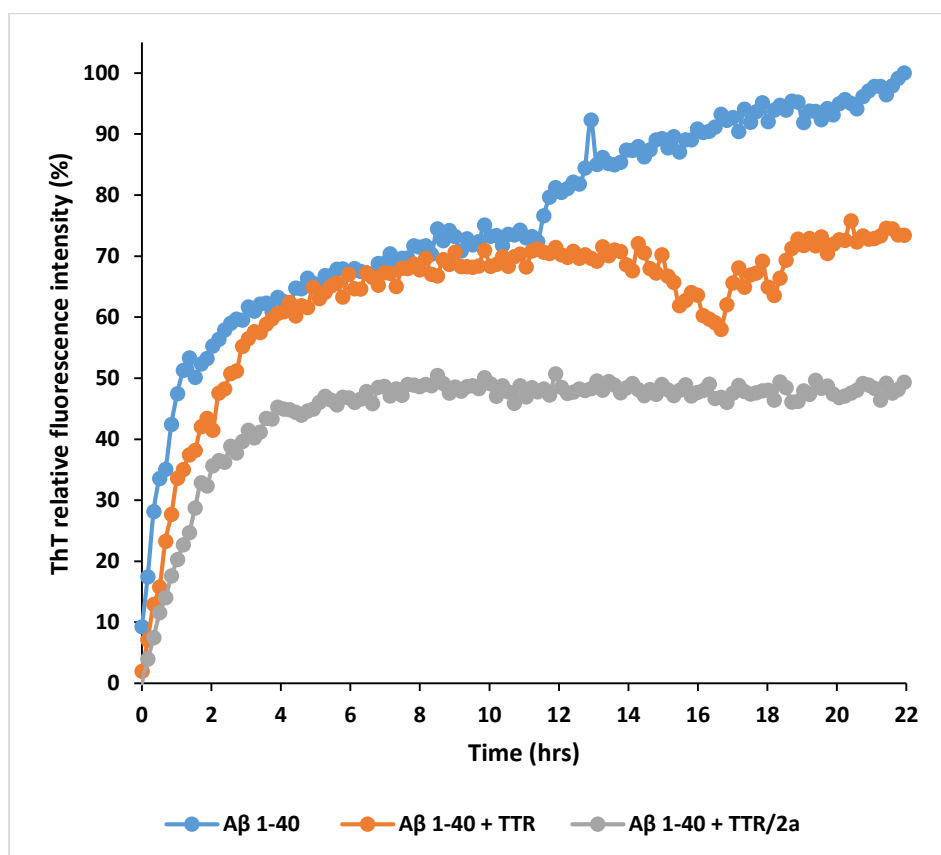

**Figure S9** Representative aggregation kinetics curves of Aβ<sub>1-40</sub> (10 μM) in the presence (orange) or absence (blue) of 10 μM of TTR with (grey) or without (orange) the pre-incubation with compound **2a** (20 μM).

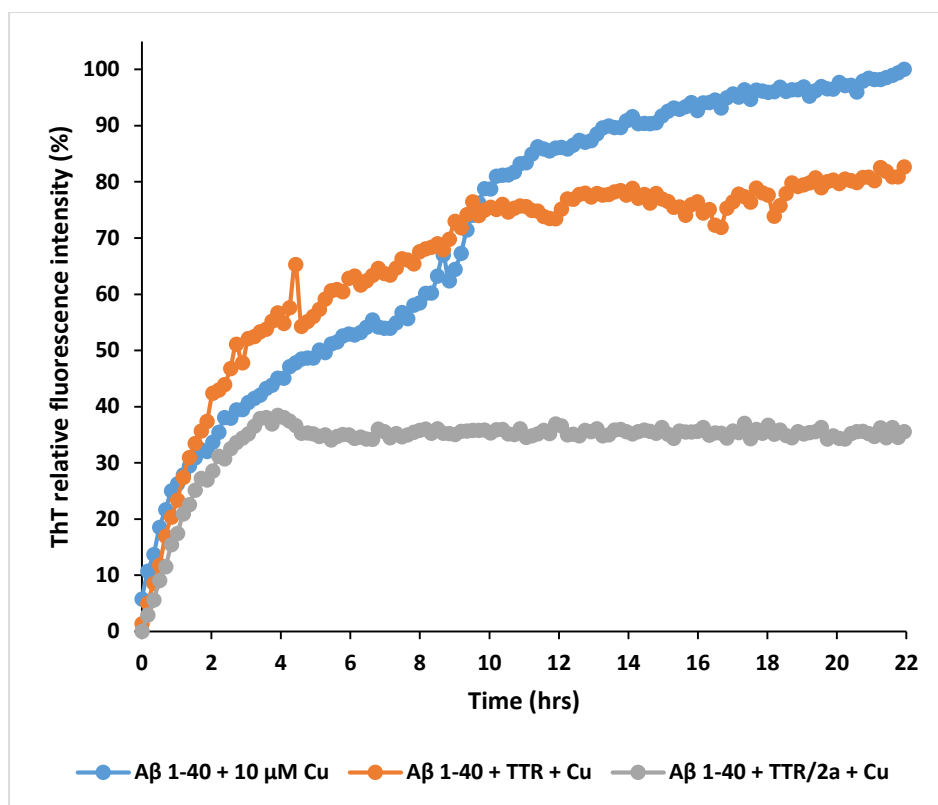

**Figure S10** Representative aggregation kinetics curves of Aβ<sub>1-40</sub> (10 μM) and 10 μM of Cu<sup>2+</sup> in the presence (orange) or absence (blue) of 10 μM of TTR with (orange) or without (grey) the pre-incubation with compound **2a** (20 μM).
